# Supplementary material for: Immobilized ruthenium metal-containing ionic liquid-catalyzed dehydrogenation of dimethylamine borane complex for the reduction of olefins and nitroarenes
Source: Royal Society of Chemistry journal article supplement (doi:10.1039/c6ra09785e), 2016-01-01

**Immobilized Ruthenium Metal-Containing Ionic Liquid-Catalyzed  
Dehydrogenation of Dimethylamine Borane Complex for the Reduction of  
Olefins and Nitroarenes**

Nilesh M. Patil,<sup>a</sup> Takehiko Sasaki<sup>b</sup> and Bhalchandra M. Bhanage<sup>a,\*</sup>

<sup>a</sup> Department of Chemistry, Institute of Chemical Technology, N. Parekh Marg, Matunga,  
Mumbai-400019, India.

\*E-mail: [bm.bhanage@gmail.com](mailto:bm.bhanage@gmail.com); [bm.bhanage@ictmumbai.edu.in](mailto:bm.bhanage@ictmumbai.edu.in)

Tel.: +91 22 33612603; Fax: +91 22 33611020.

<sup>b</sup> Department of Complexity Science and Engineering, Graduate School of Frontier Sciences,  
The University of Tokyo, 5-1-5, Kashiwanoha, Kashiwa, Chiba 277-8561, Japan.

**Supporting Information**

| <b>Sr. no.</b> | <b>Content</b>                                                           |
|----------------|--------------------------------------------------------------------------|
| 1              | GCMS of all products                                                     |
| 2              | Copies of <sup>1</sup> H and <sup>13</sup> C NMR Spectra of all products |

# 1. GCMS of alkanes.

## 1) Ethyl benzen

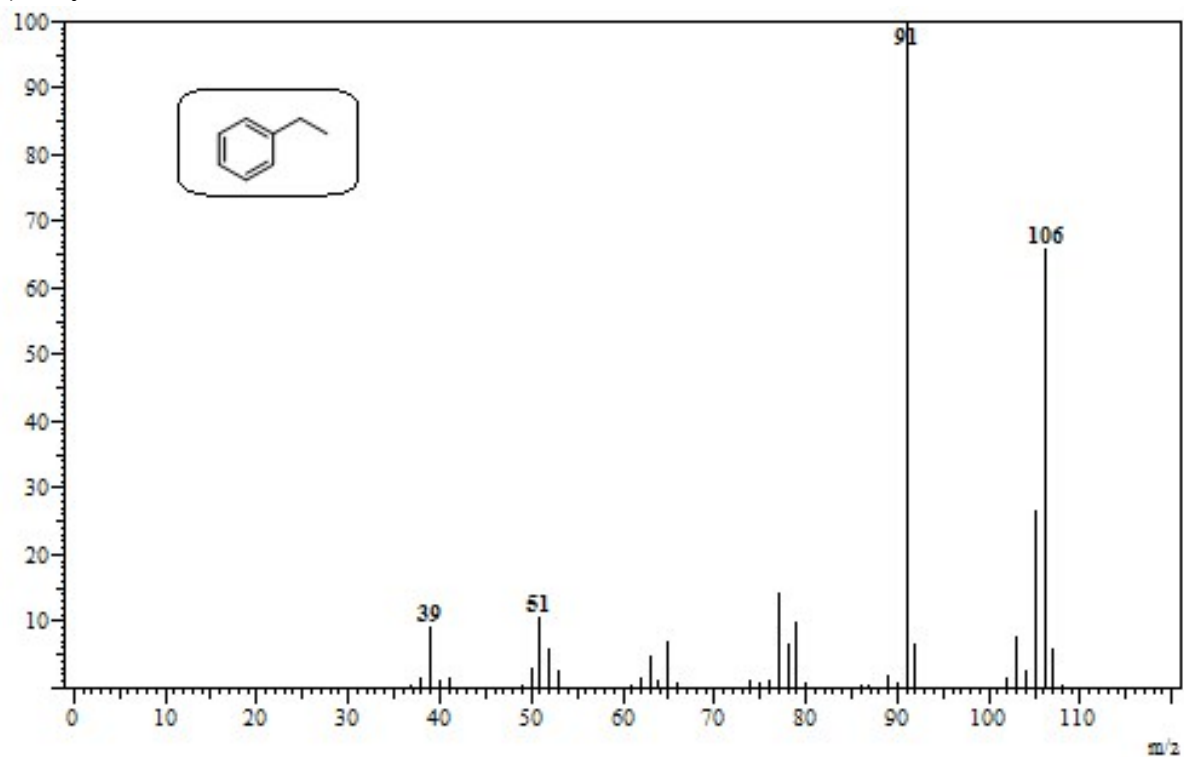

## 2) Cyclohexane

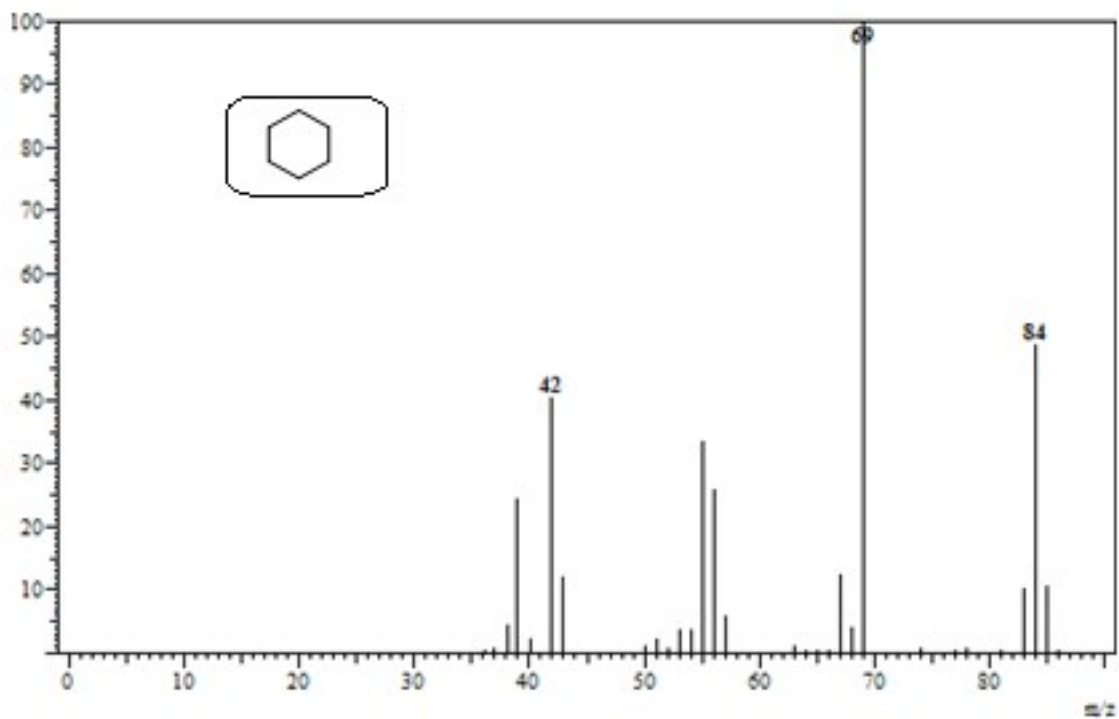

### 3) *N*-Decane

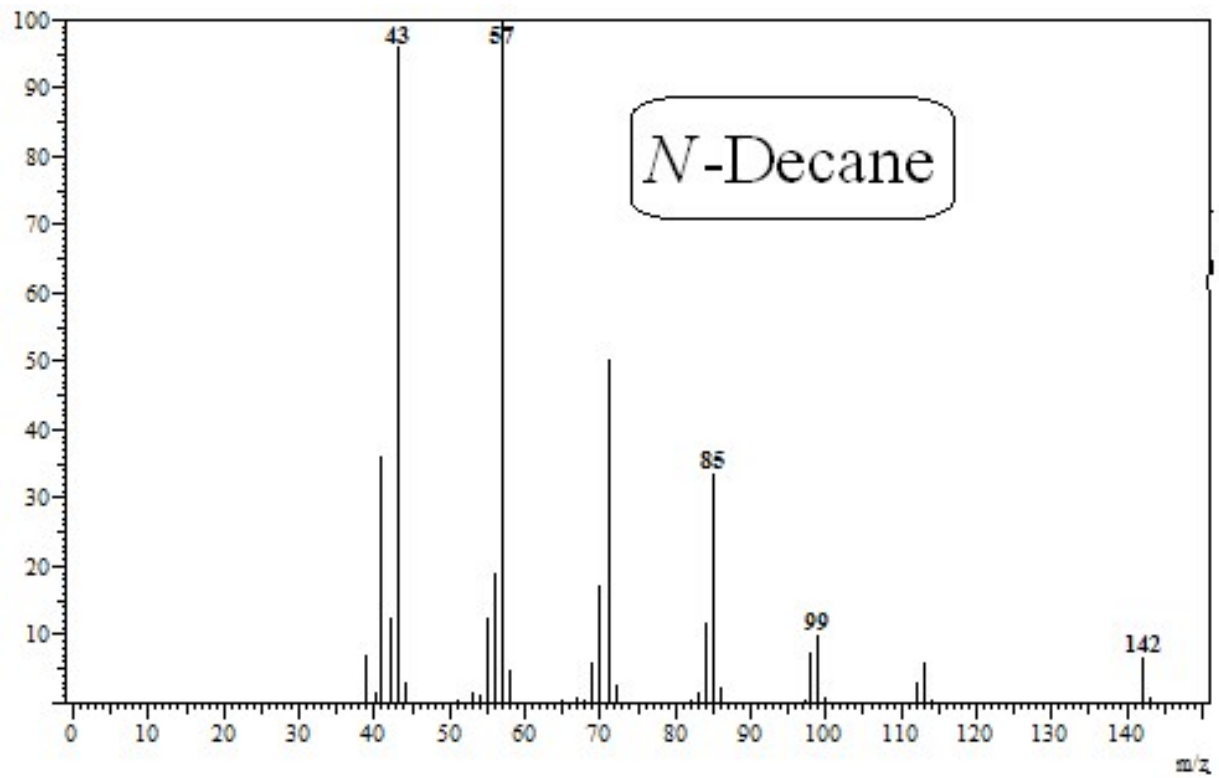

### 4) *N*-Hexane

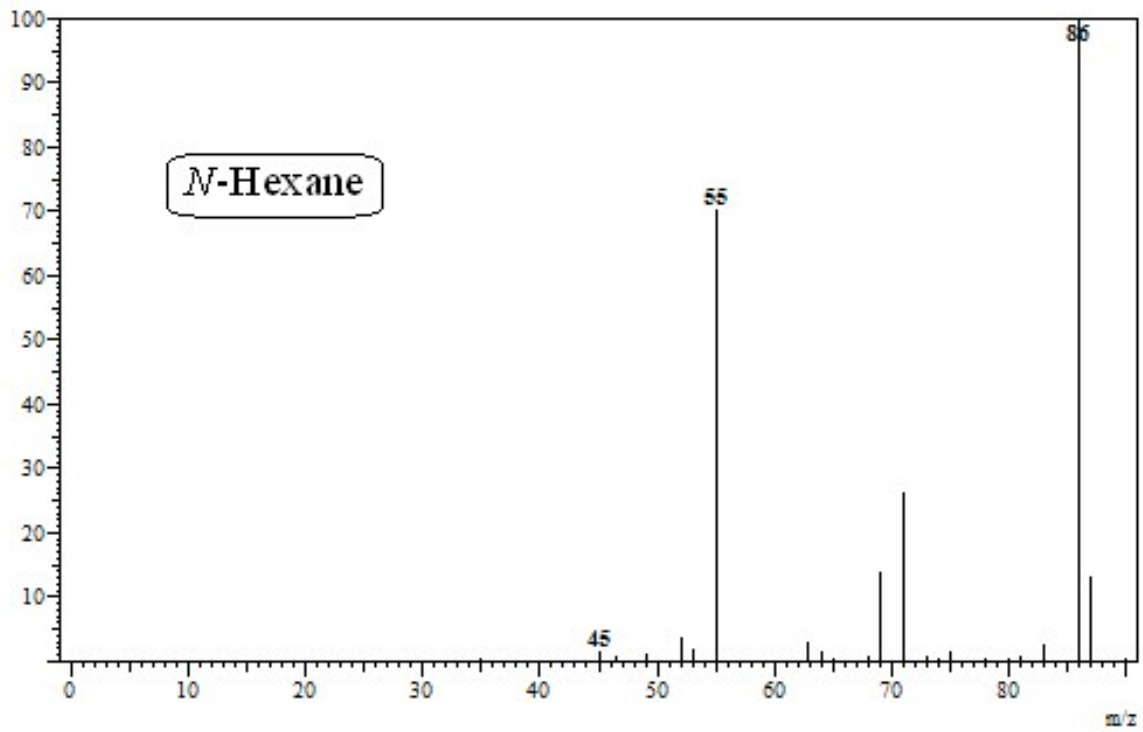

### 5) 4-Ethyltoulène

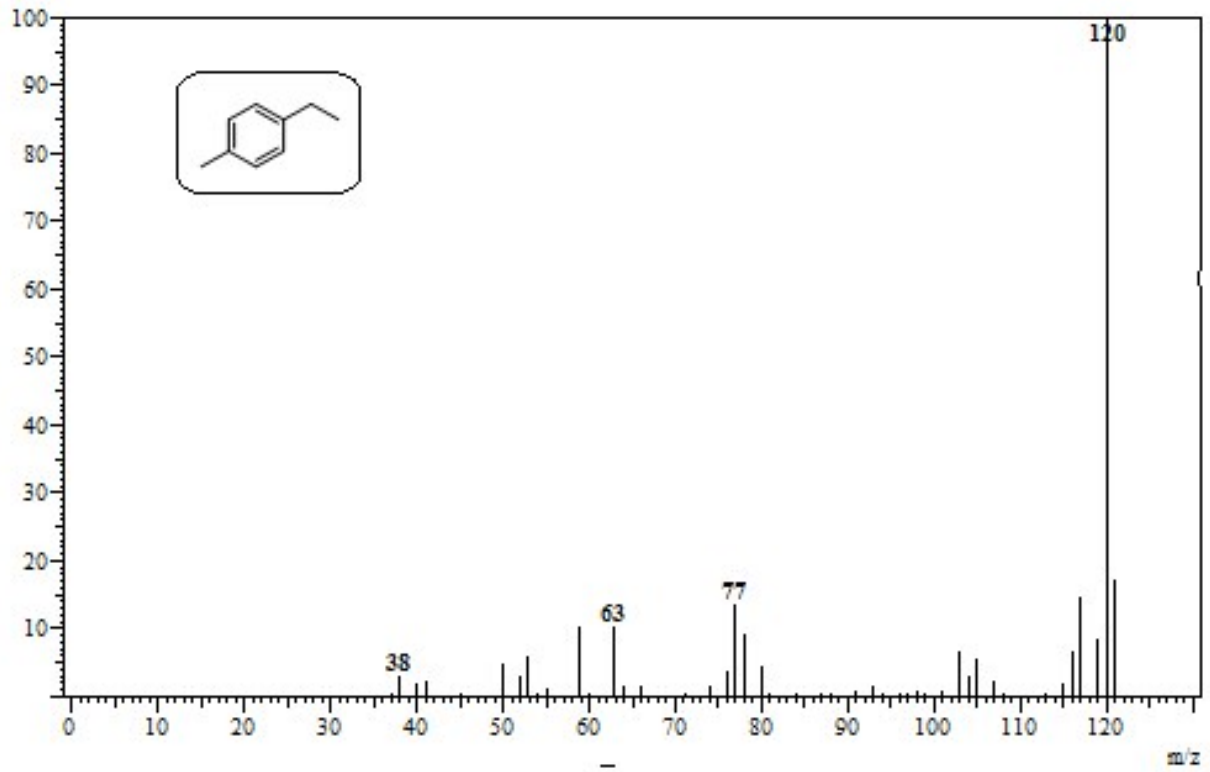

### 6) 4-éthylaniline

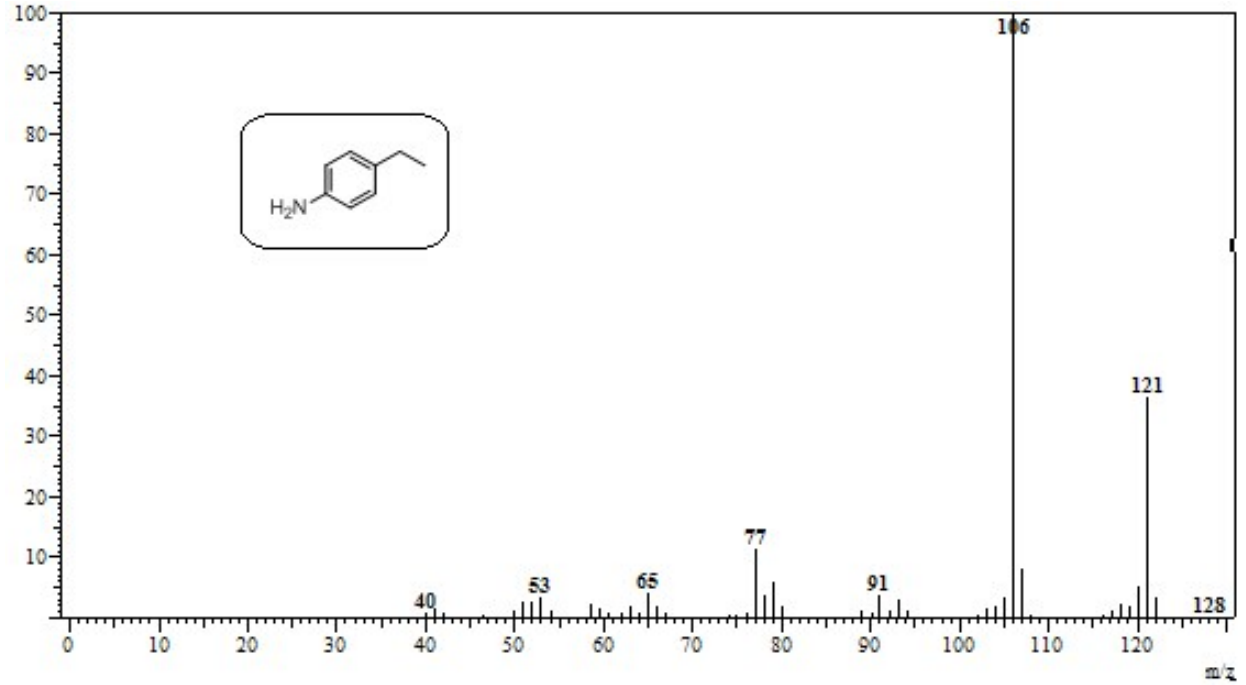

### 7) Propylbenzene

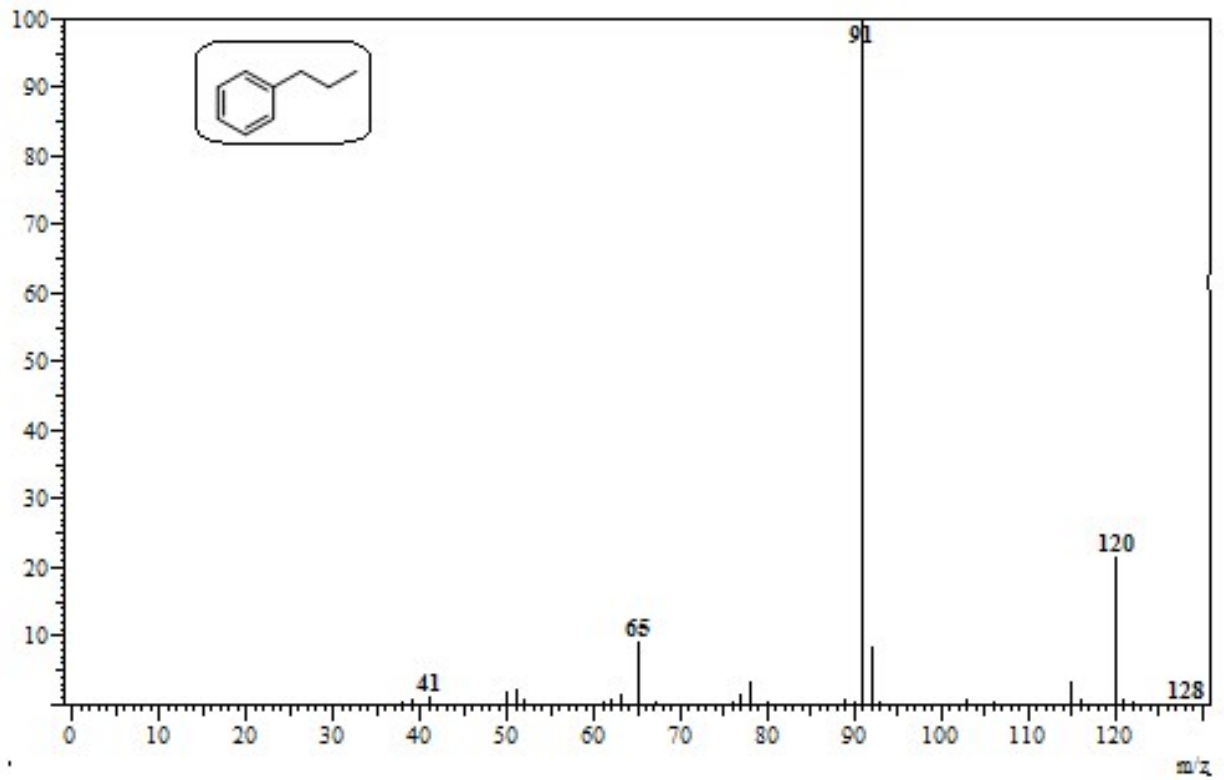

### 8) 4-Propylanisole

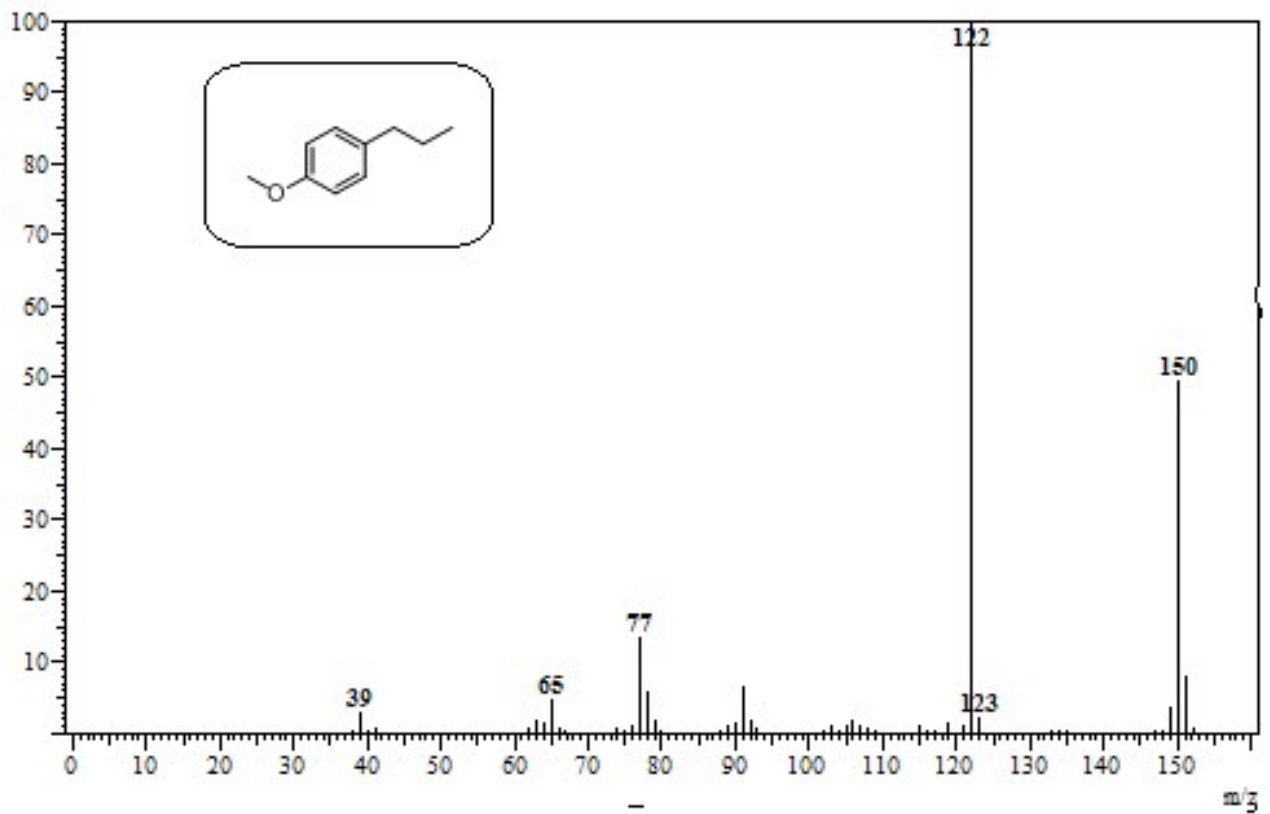

9) 2-Methoxy-4-propylphenol

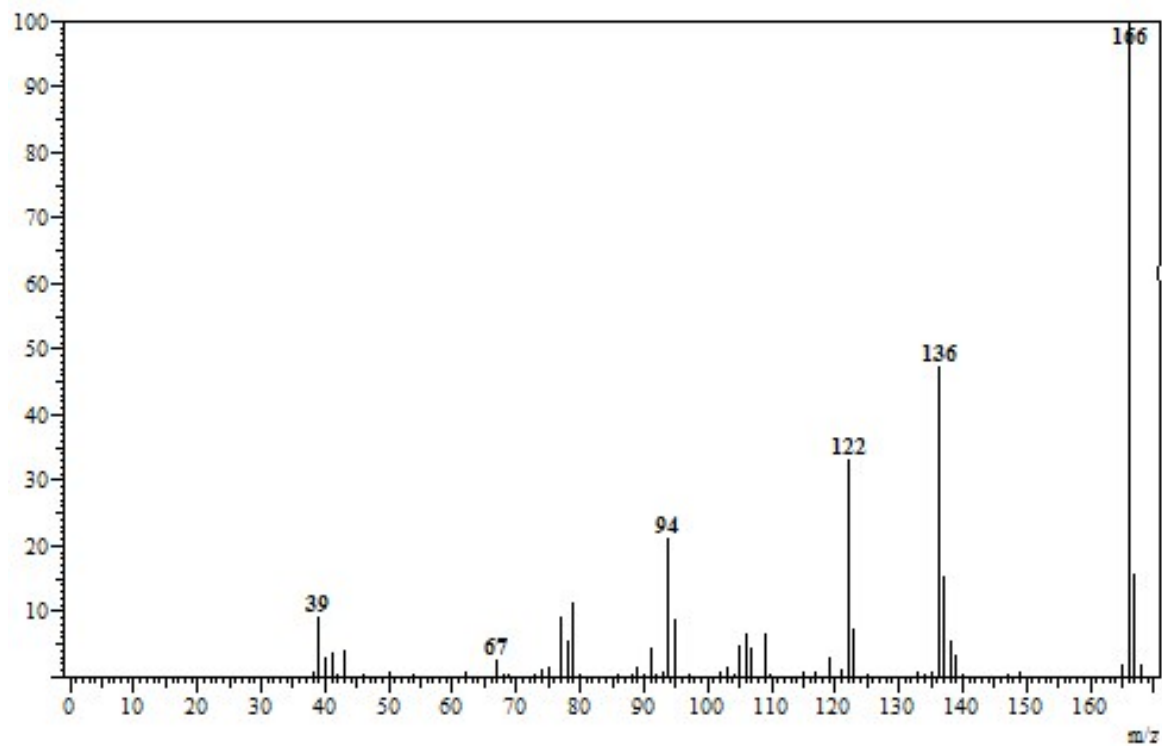

10) 1-(*tert*-butyl)-4-ethylbenzene

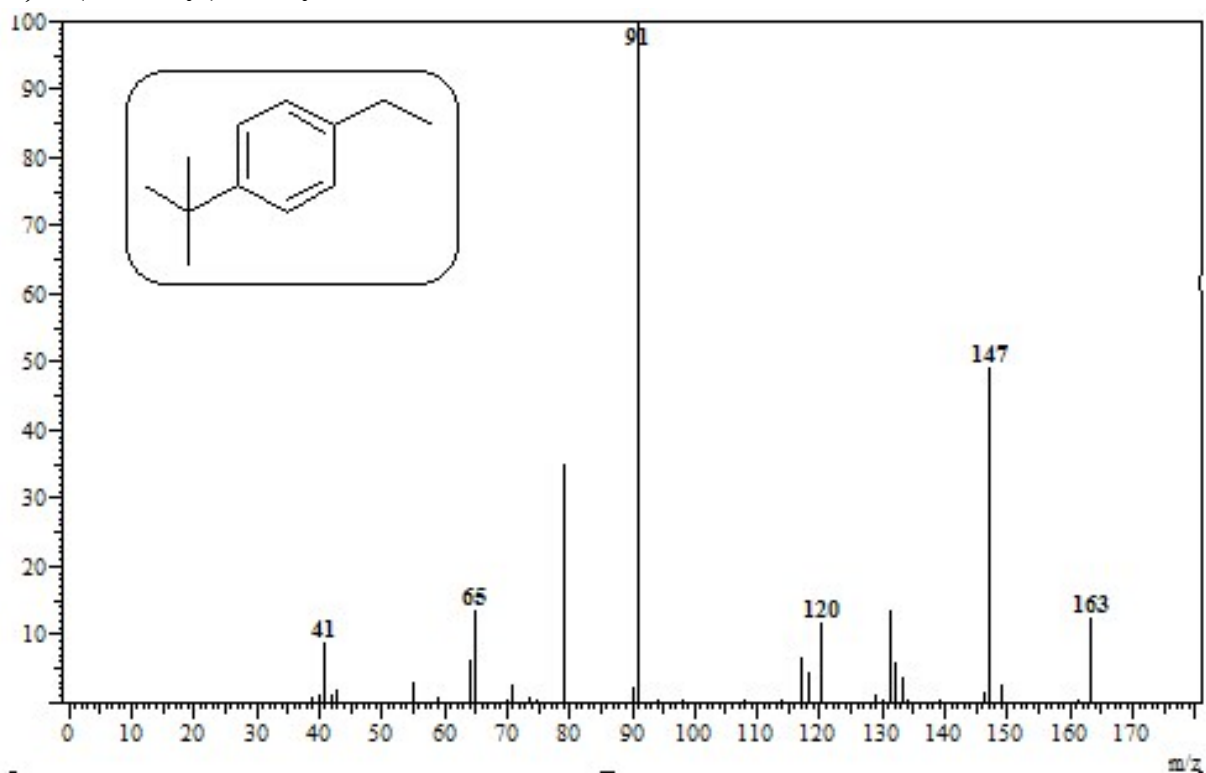

# 11) 2-ethylpyridine

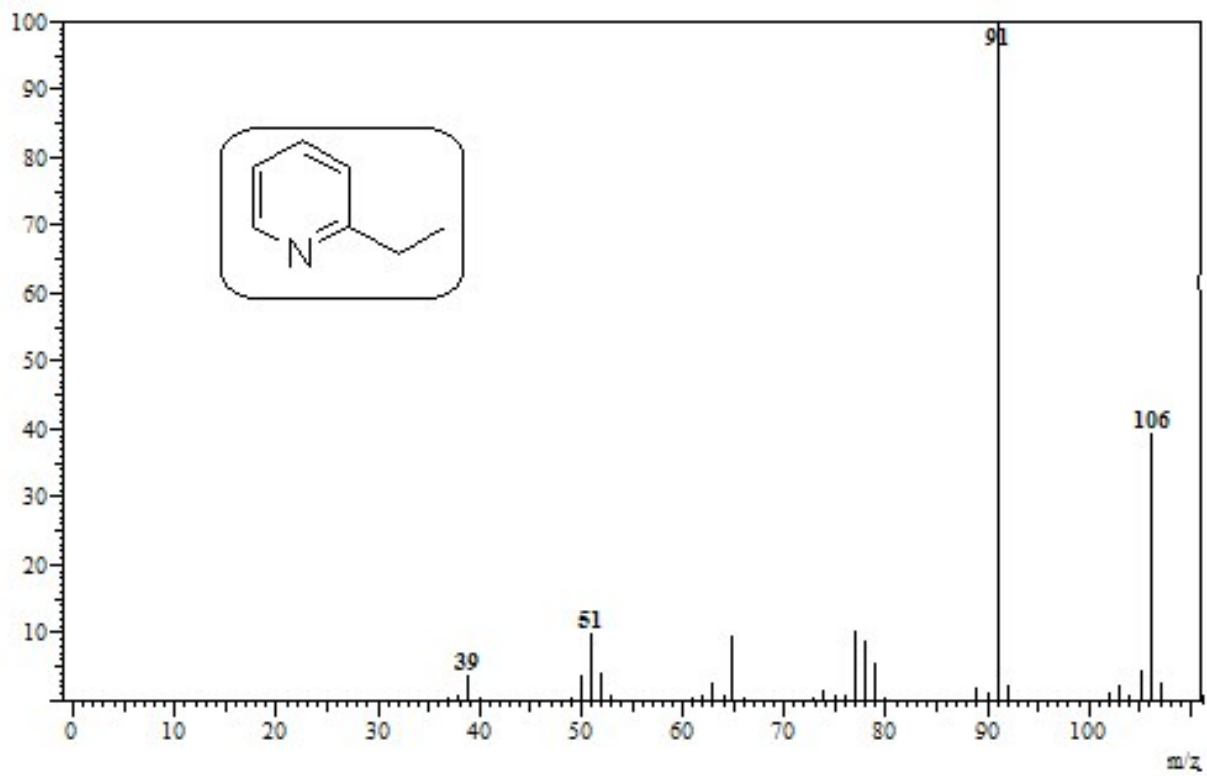

## 2. GCMS of Amines.

### 1) Aniline

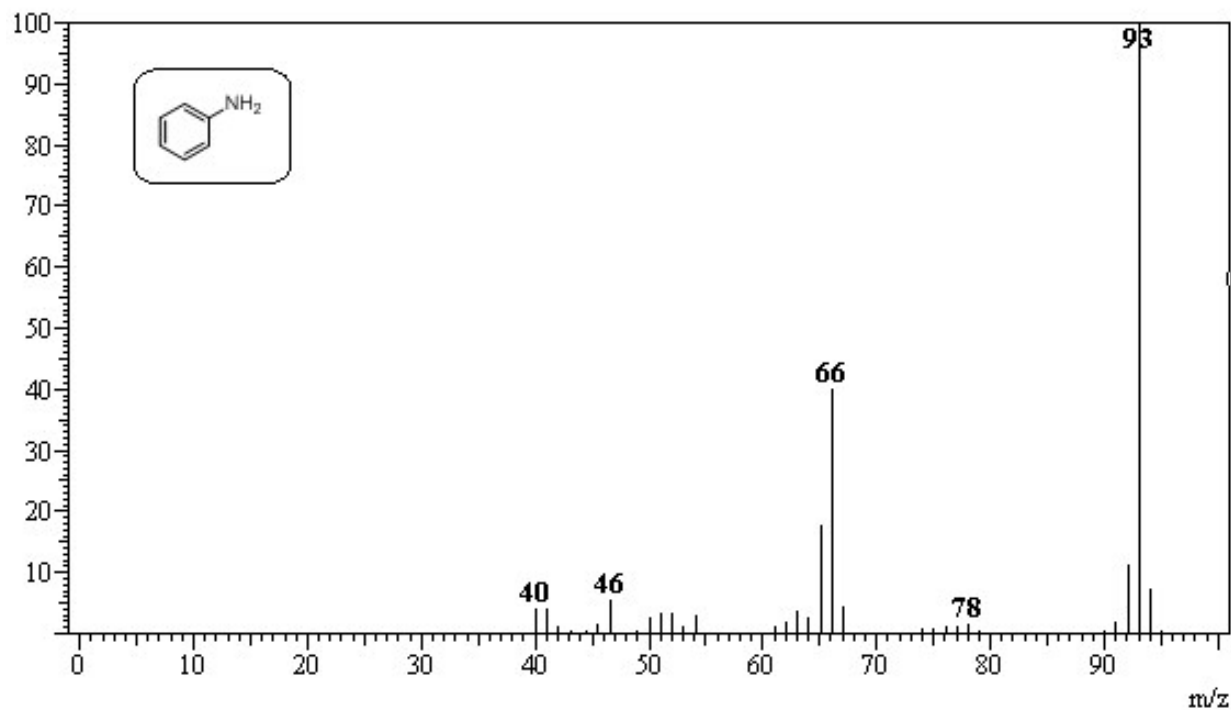

### 2) 2-Chloroaniline

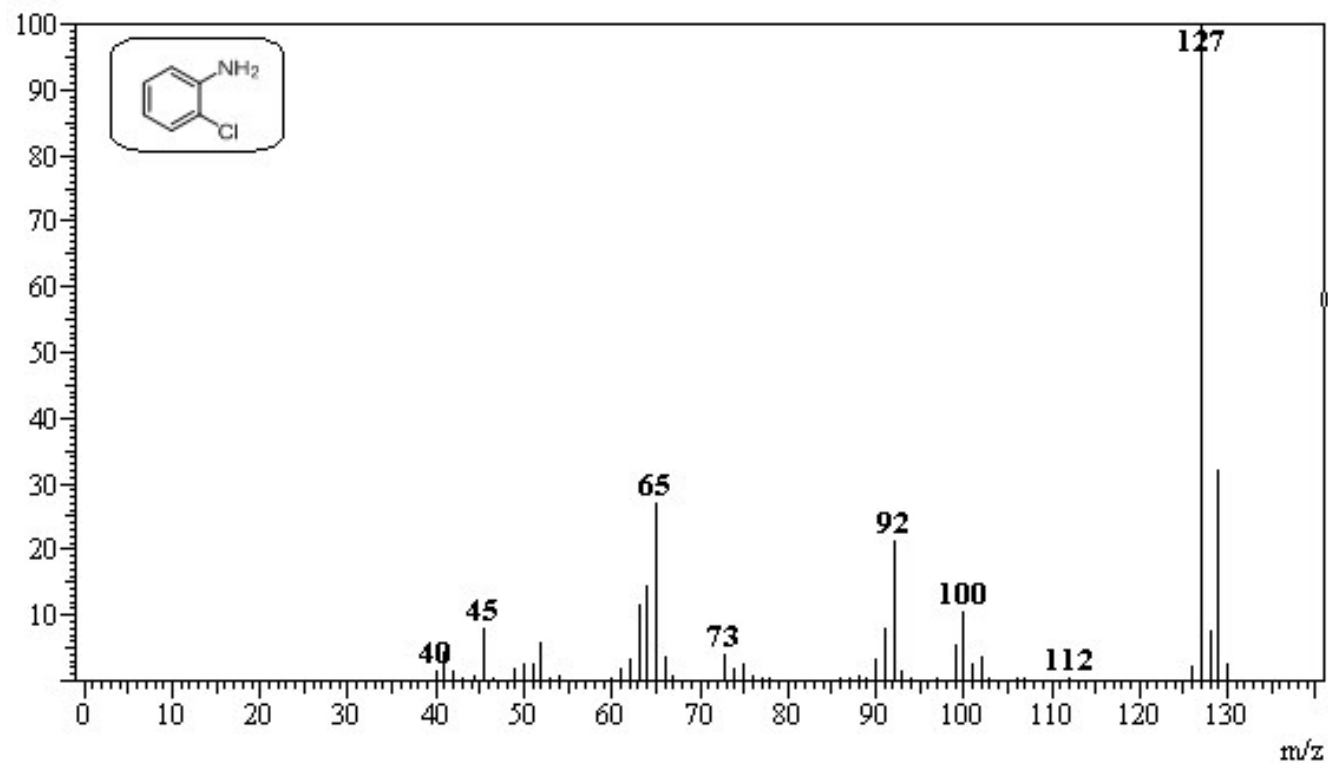



### 3) 2-Fluoroaniline

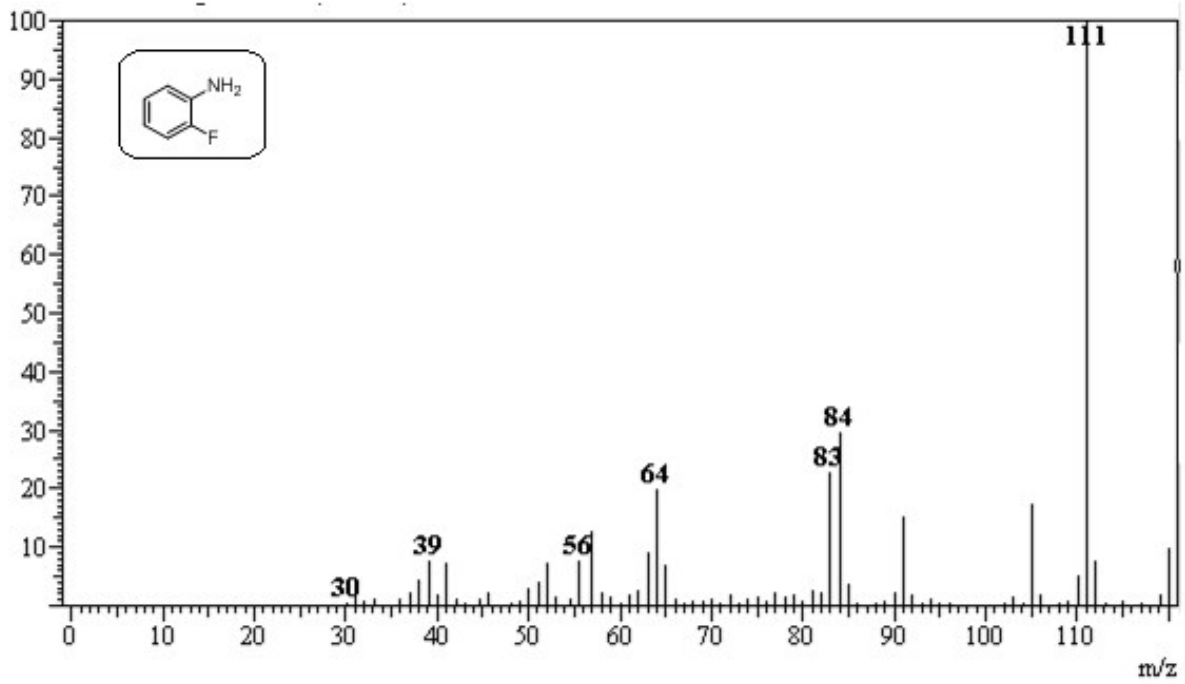

### 4) 4-Iodoaniline

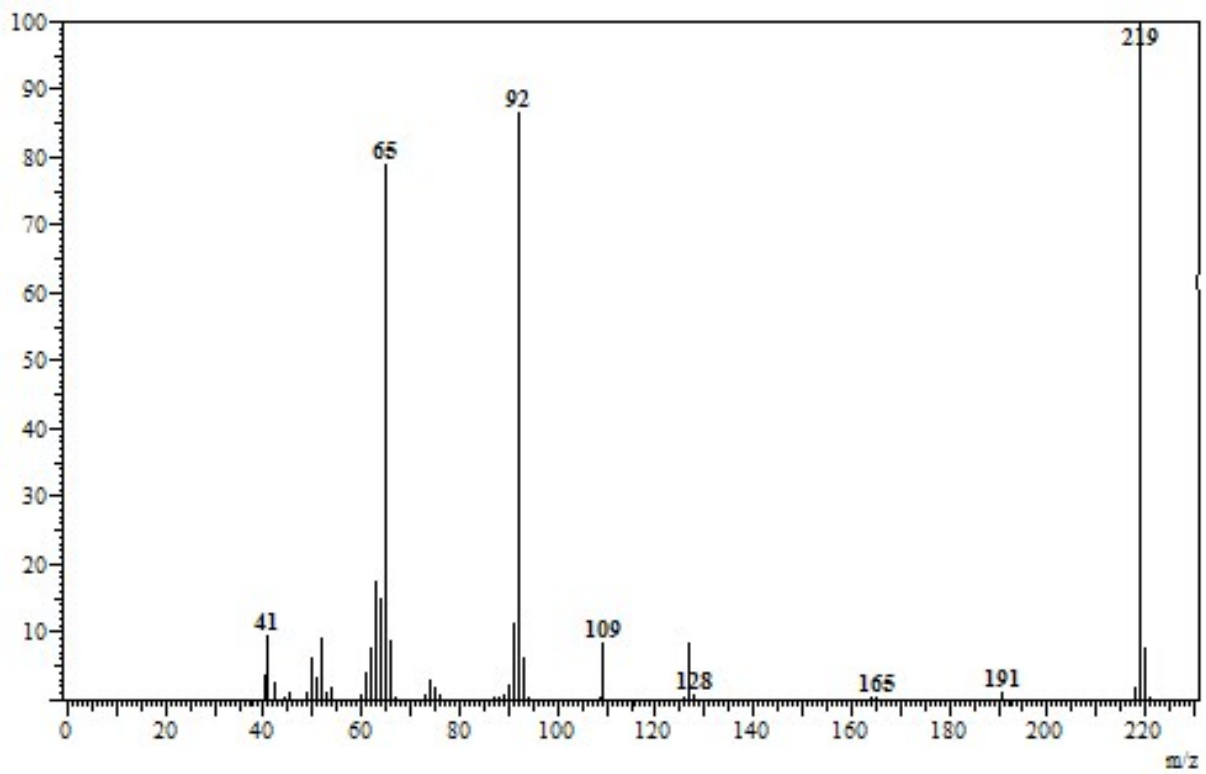

### 5) *o*-Toluidine

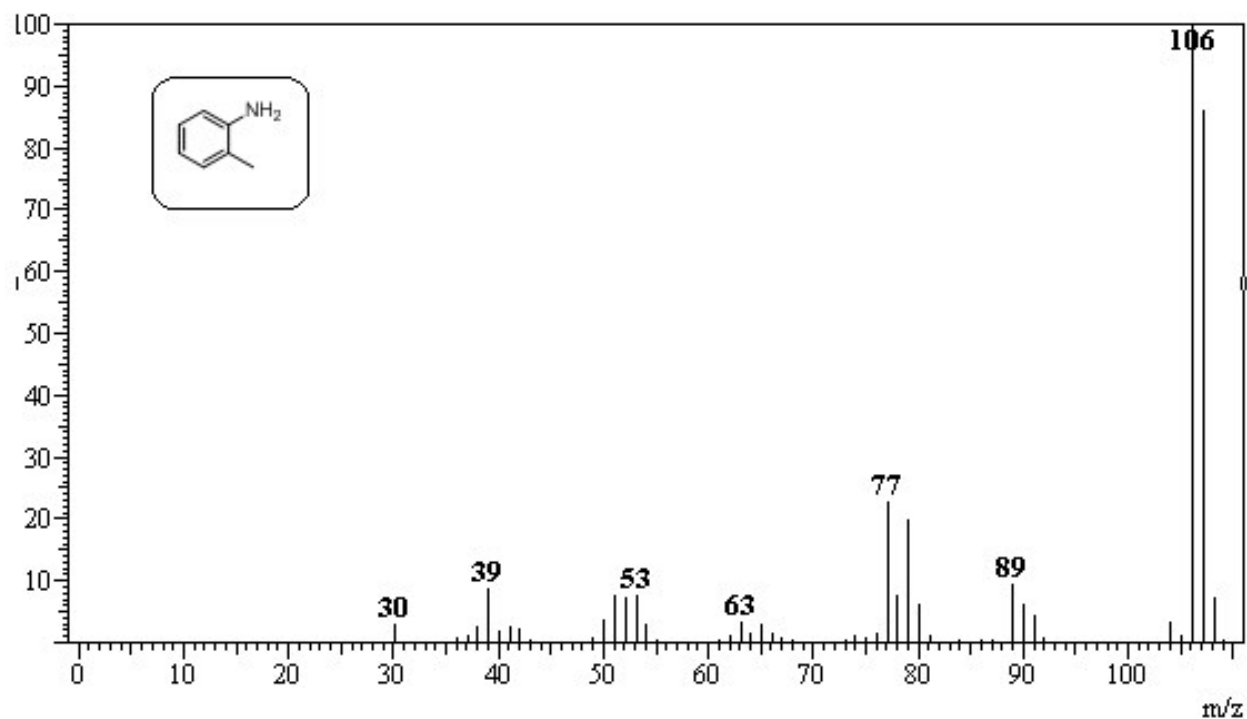

### 6) *m*-Toluidine

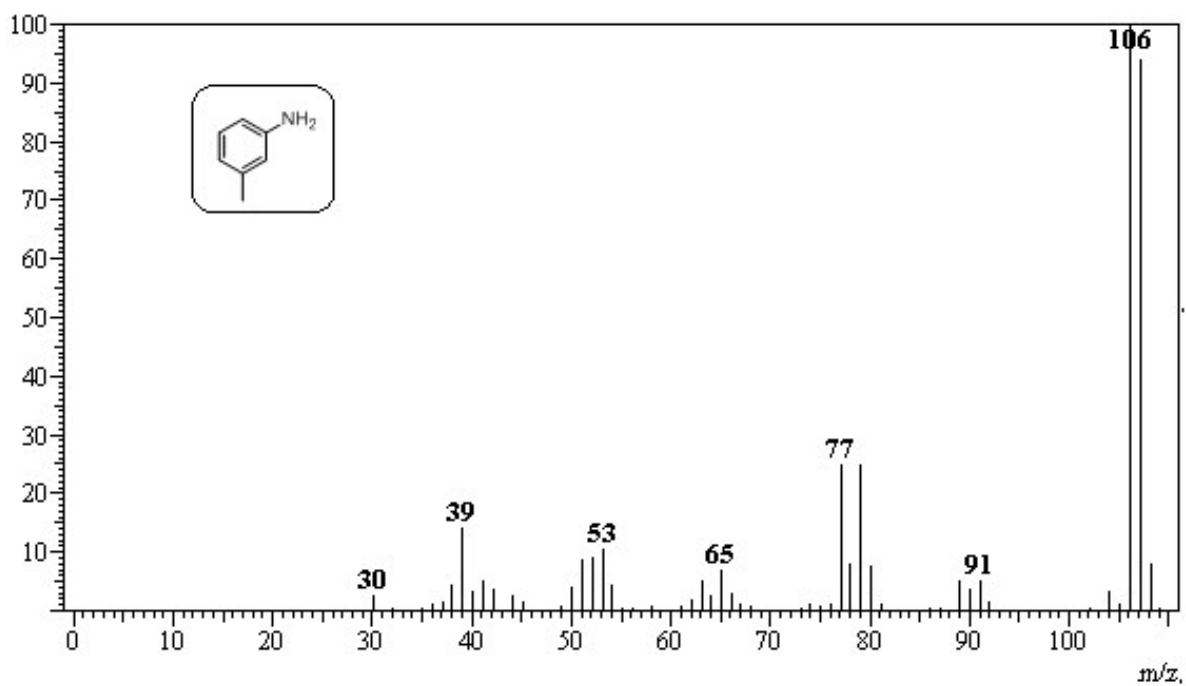

### 7) *p*-Toluidine

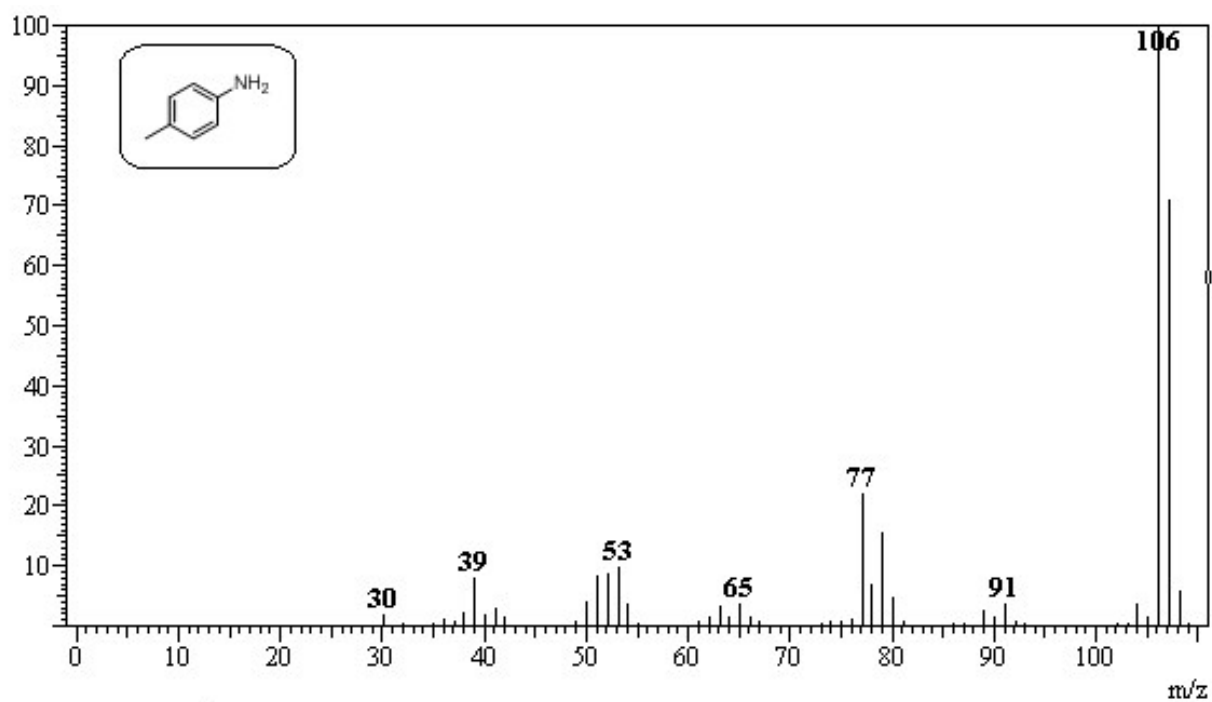

### 8) *p*-Anisidine

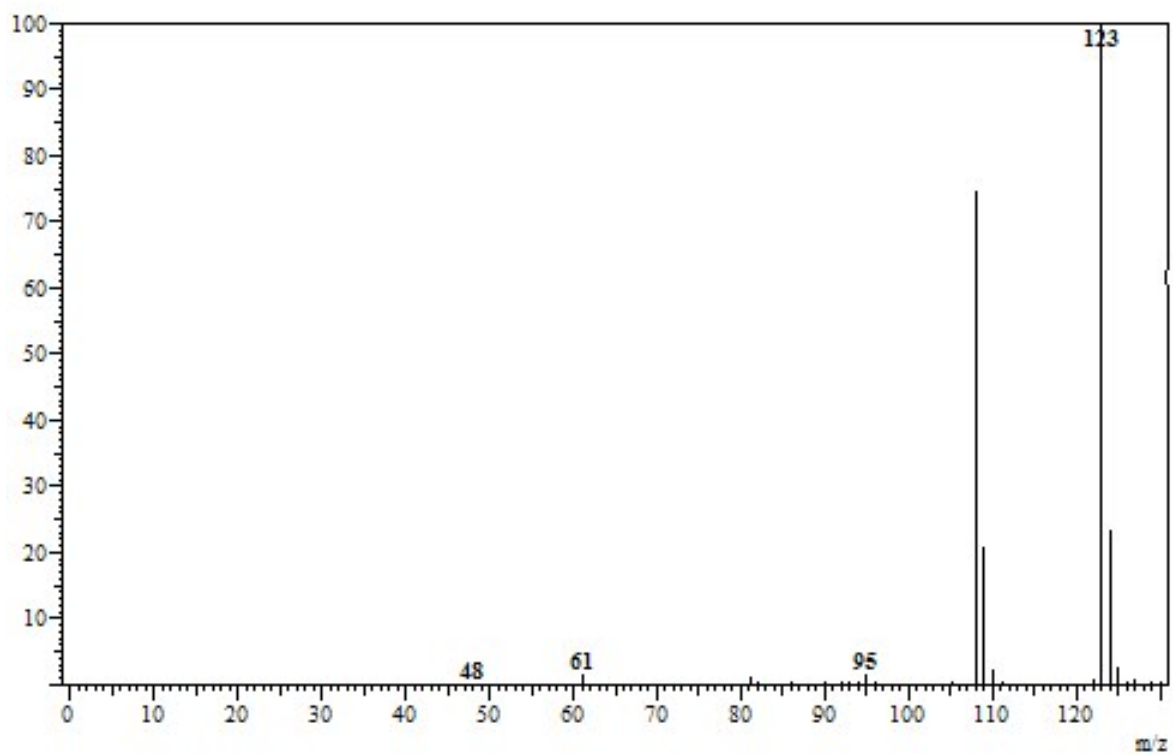

### 9) *m*-Aminophenol

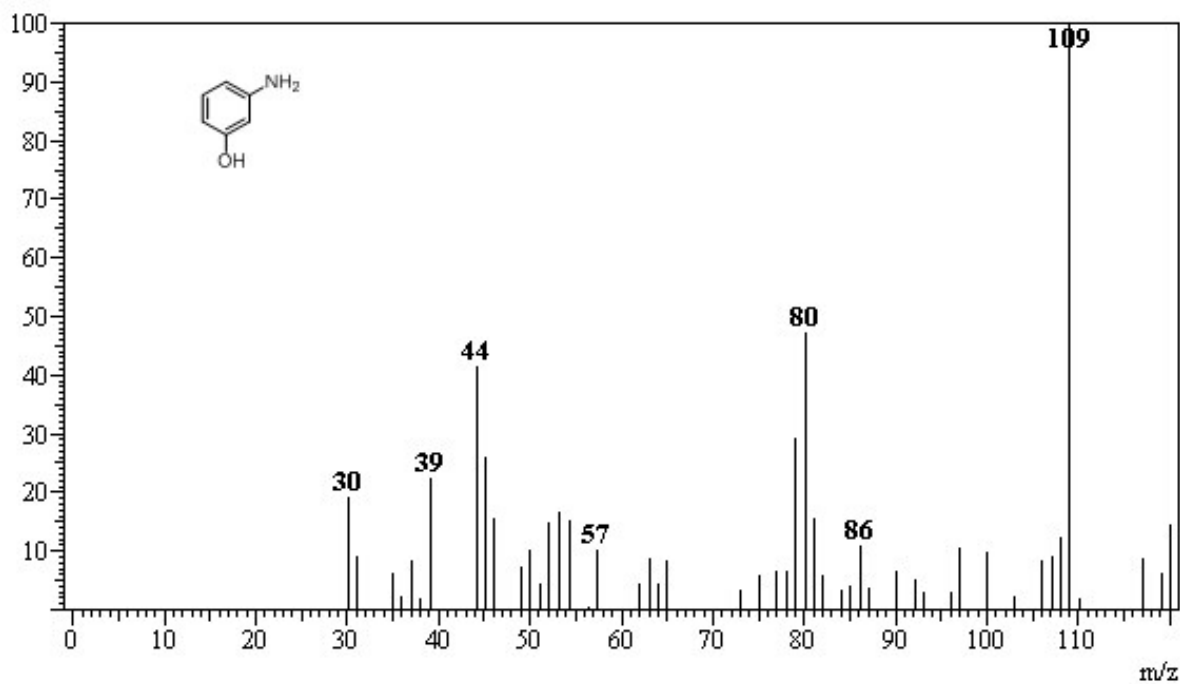

### 10) *p*-Aminophenol

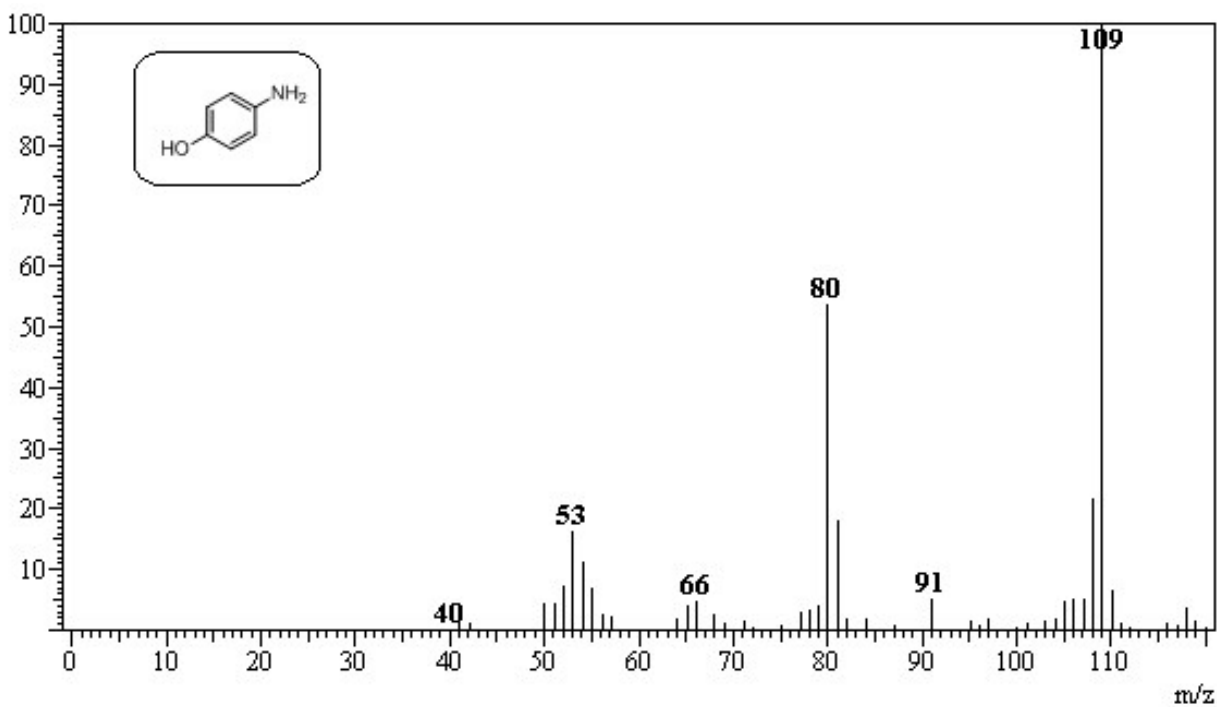

### 11) 2-Aminobenzylalcohol

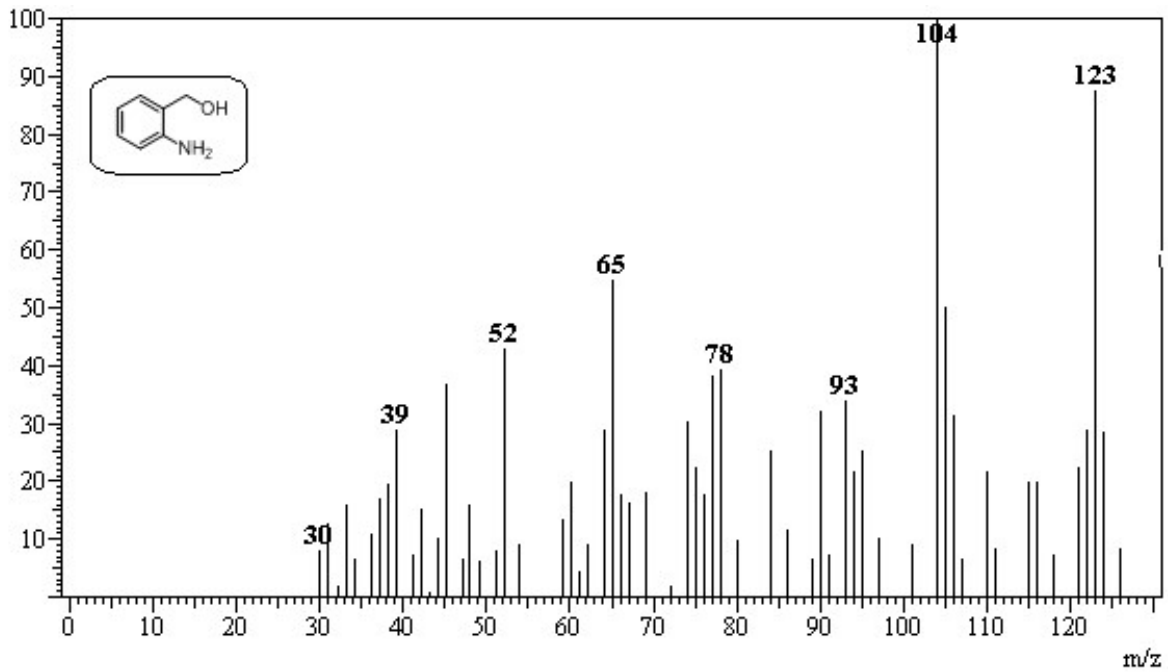

### 12) *o*-Phenylenediamine

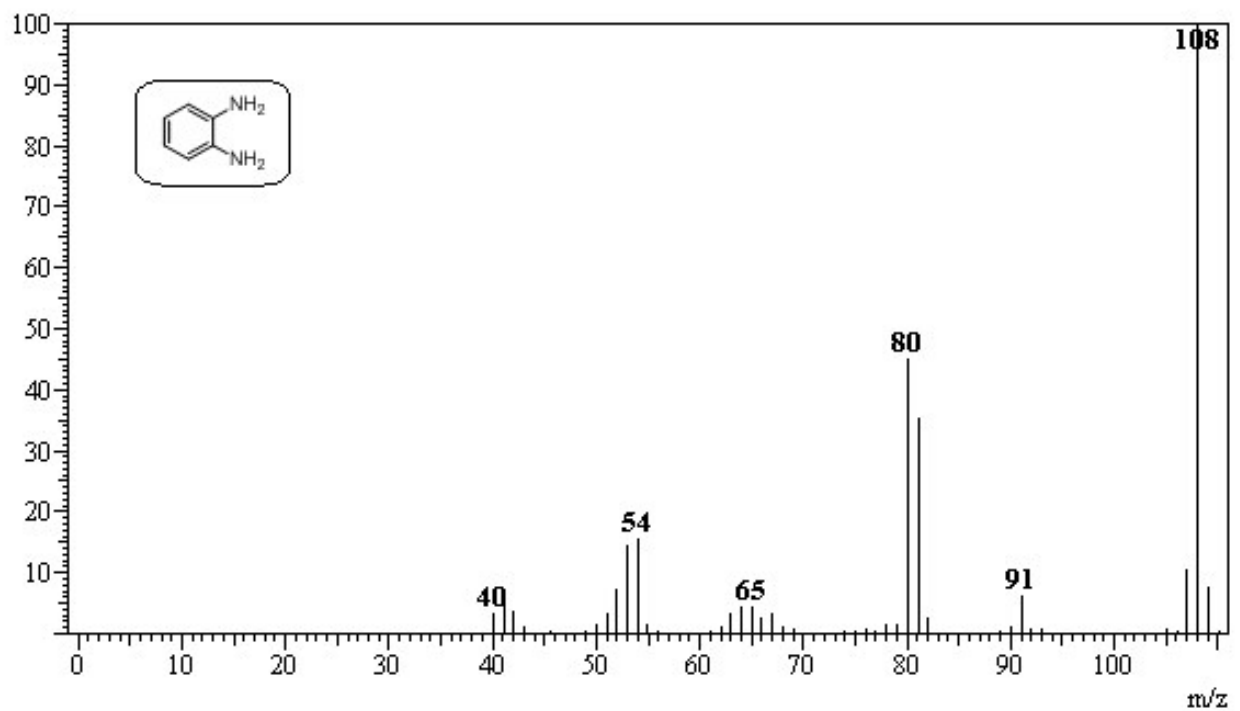

### 13) 4-Aminobenzonitrile

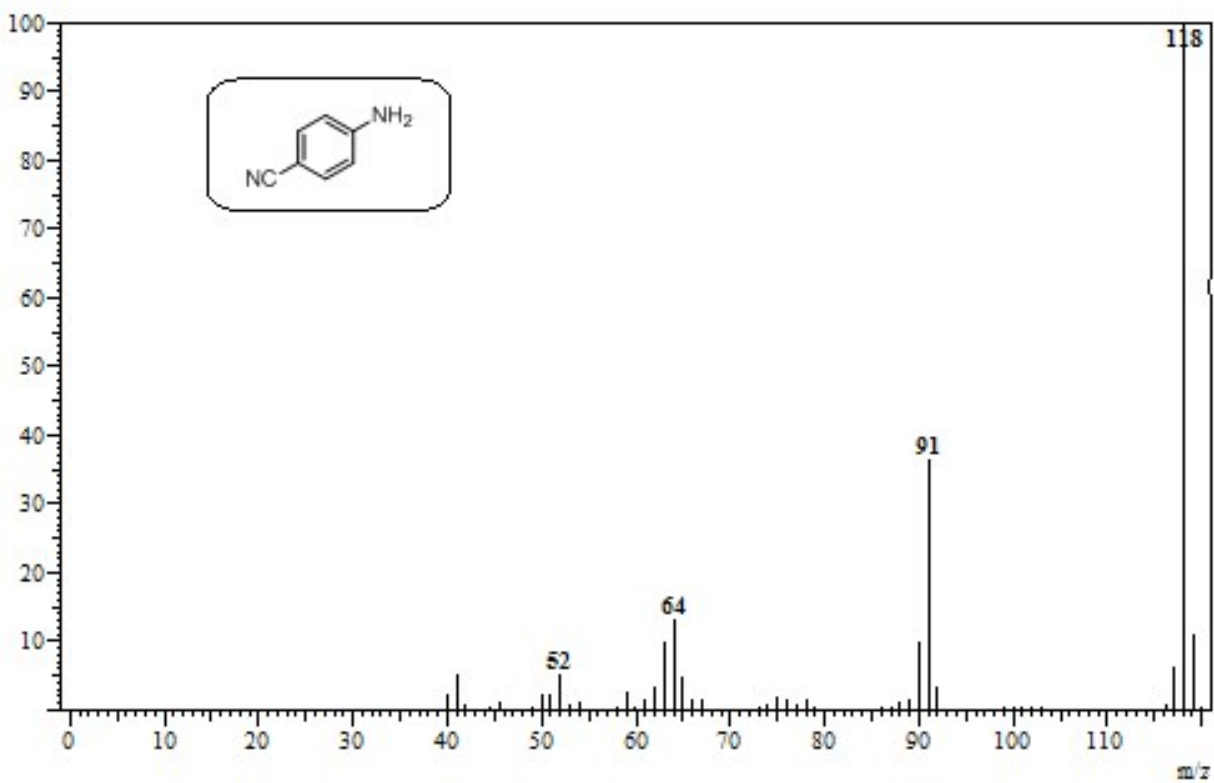

# NMR Spectra of alkanes

## 1) Ethyl benzene

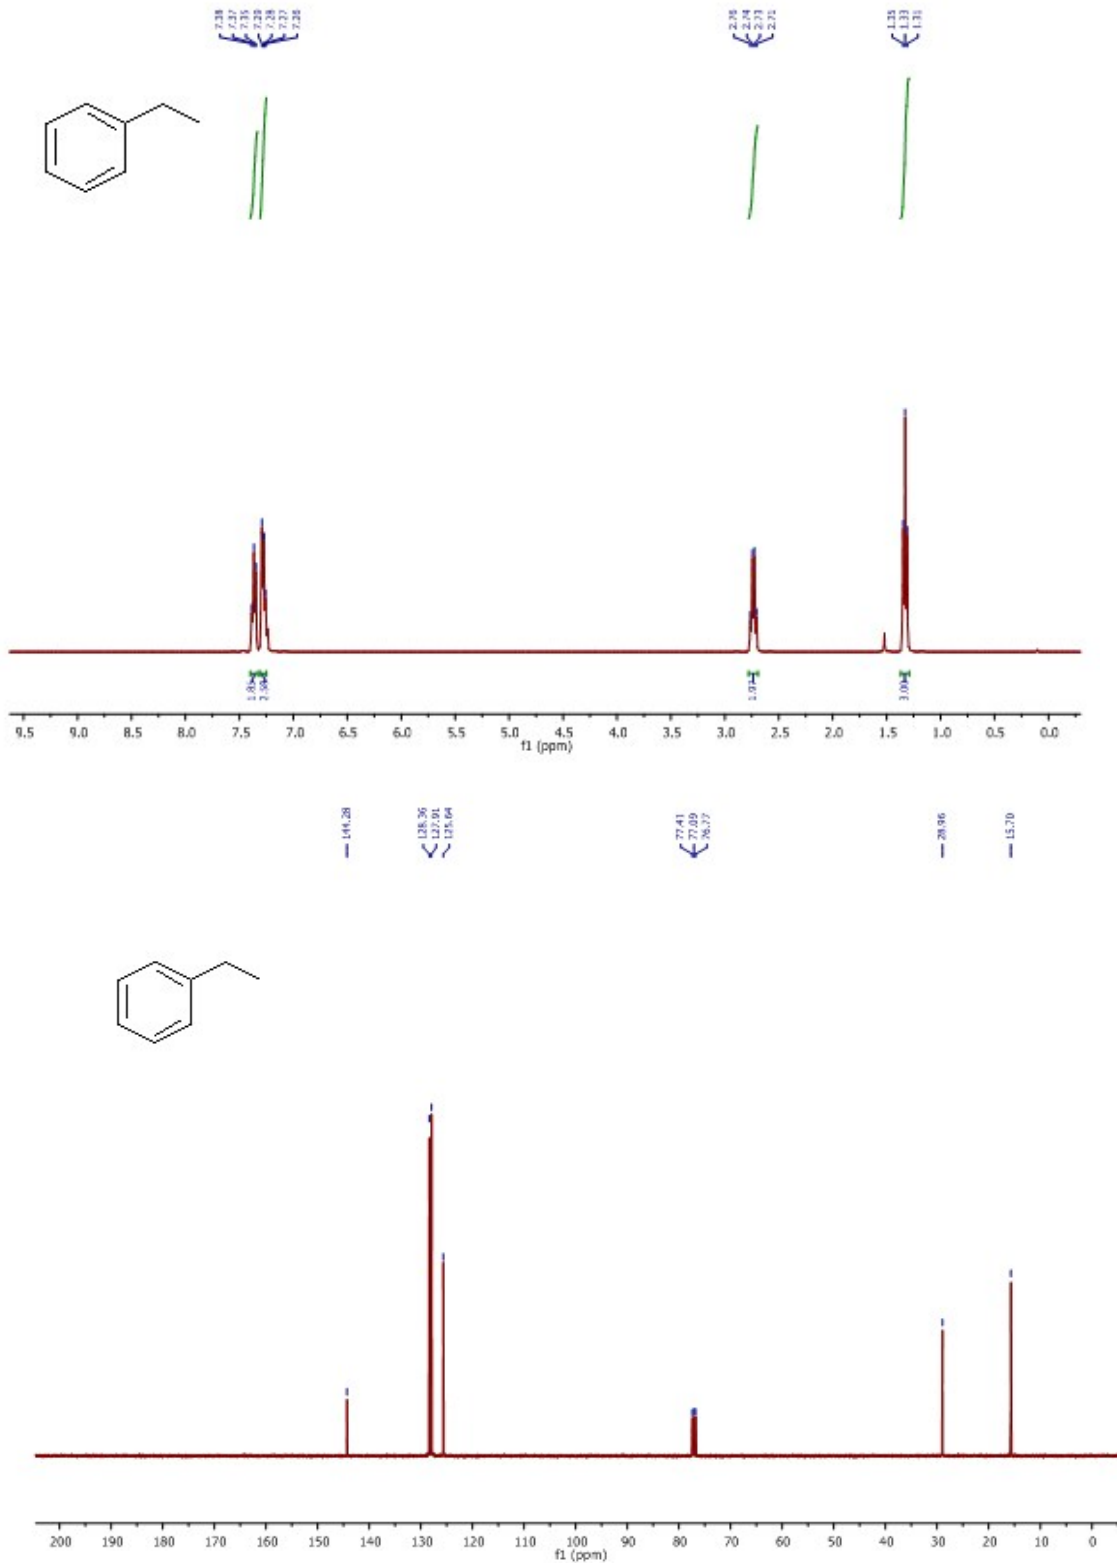

## 2) Cyclohexane

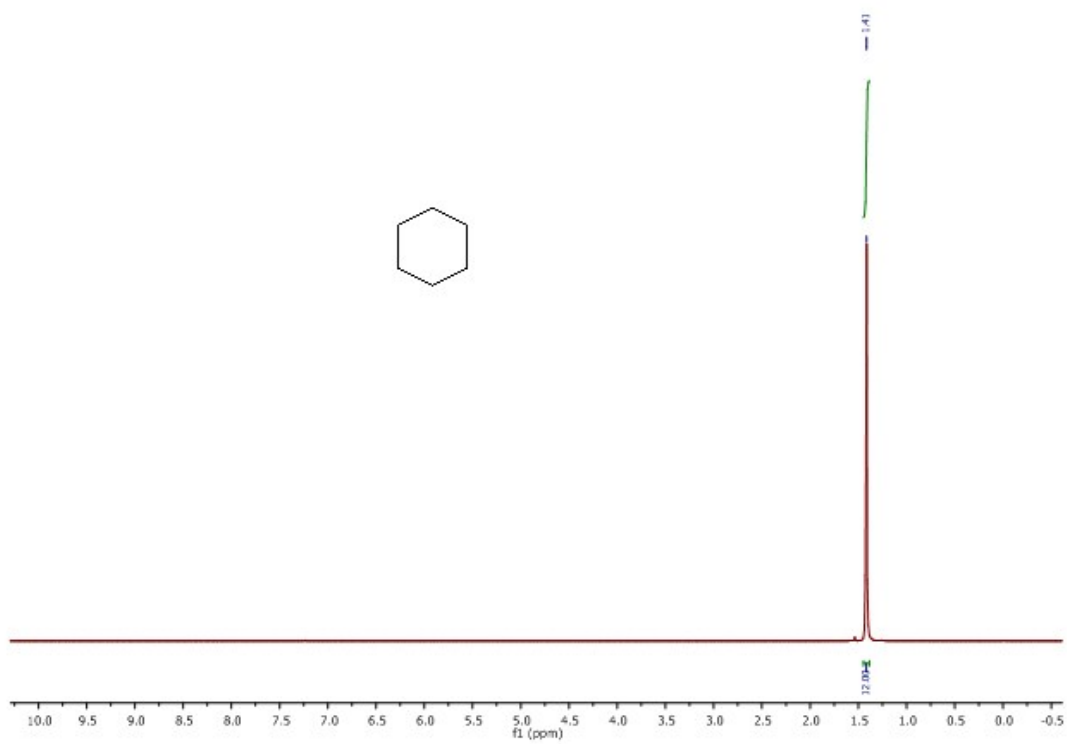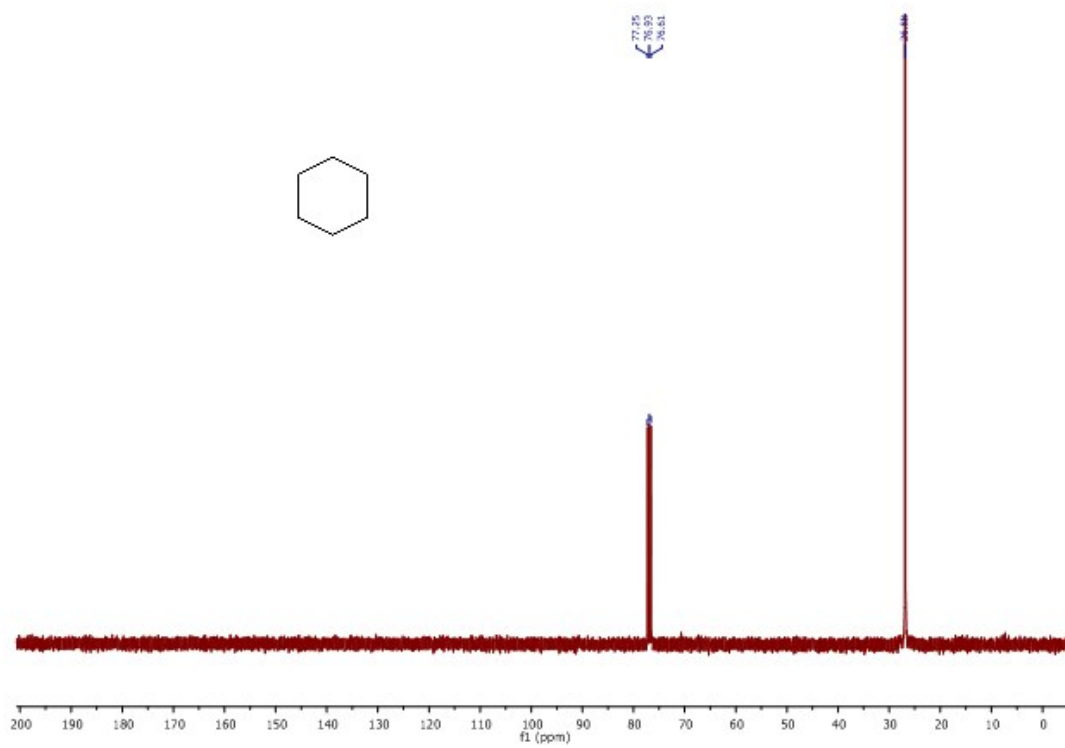



### 3) *N*-Decane

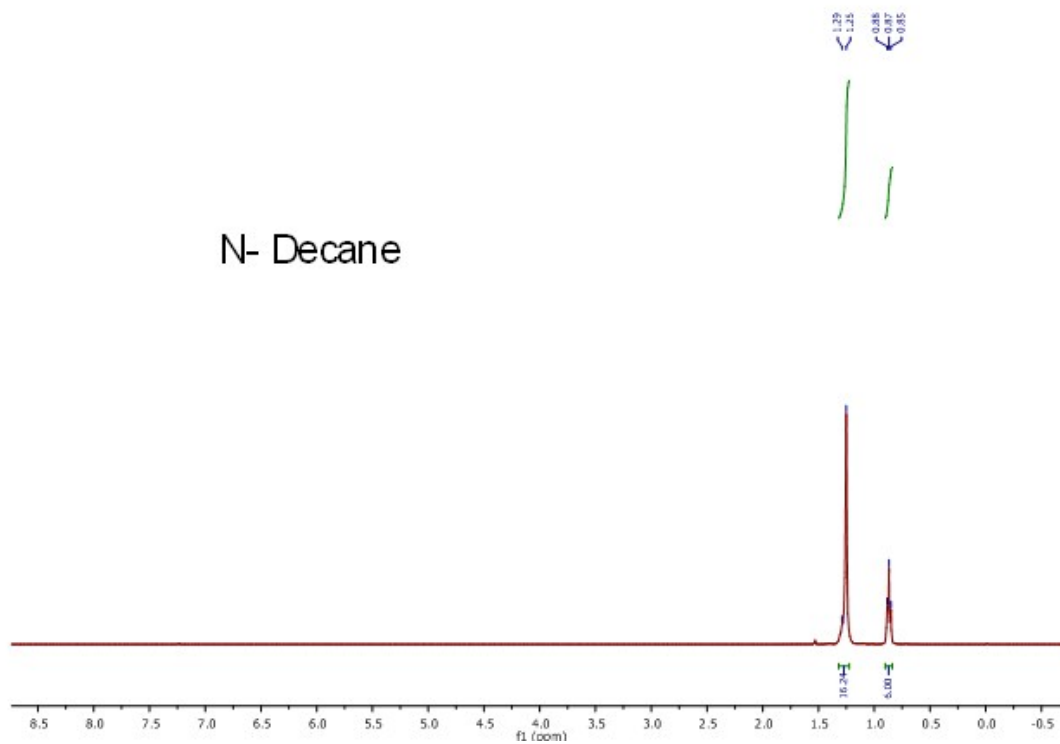

### N- Decane

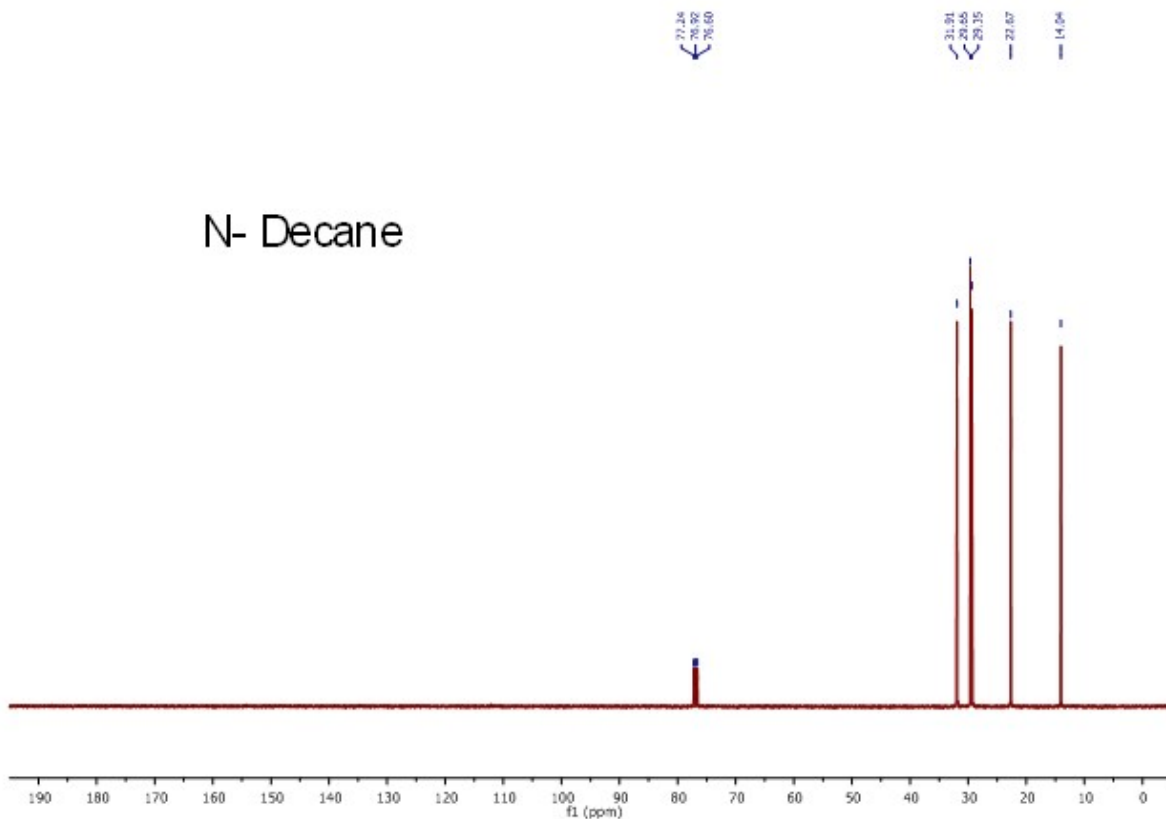

#### 4)4-Ethyltoulène

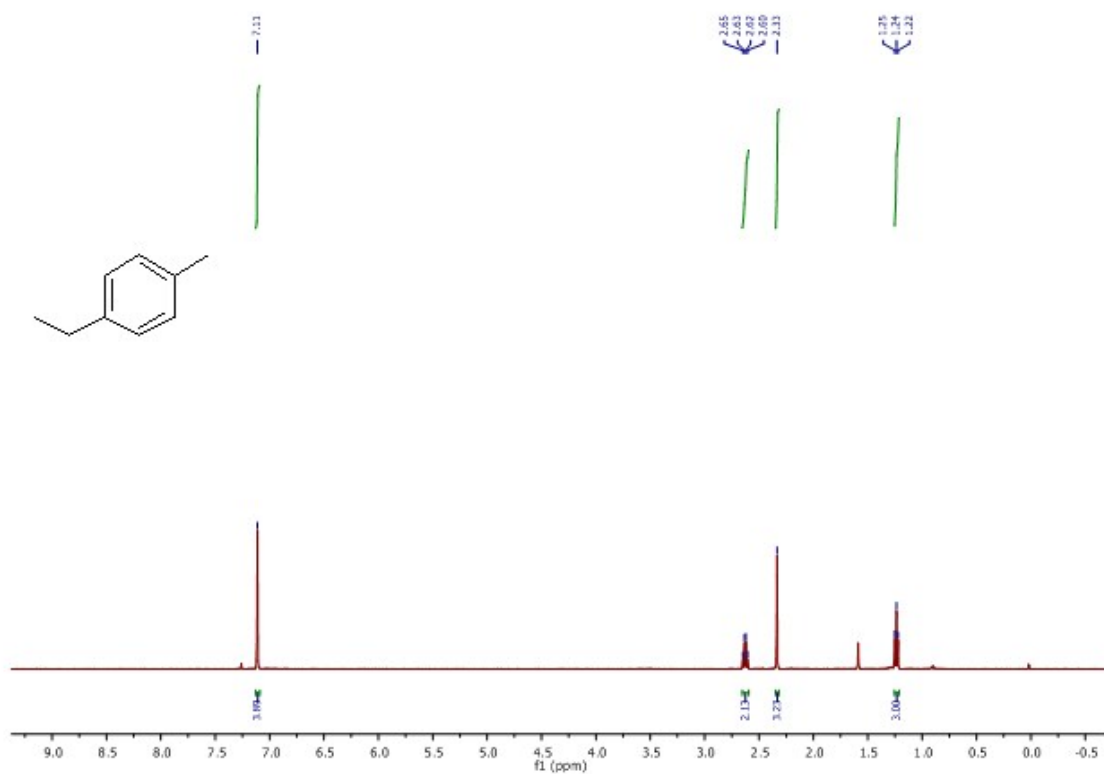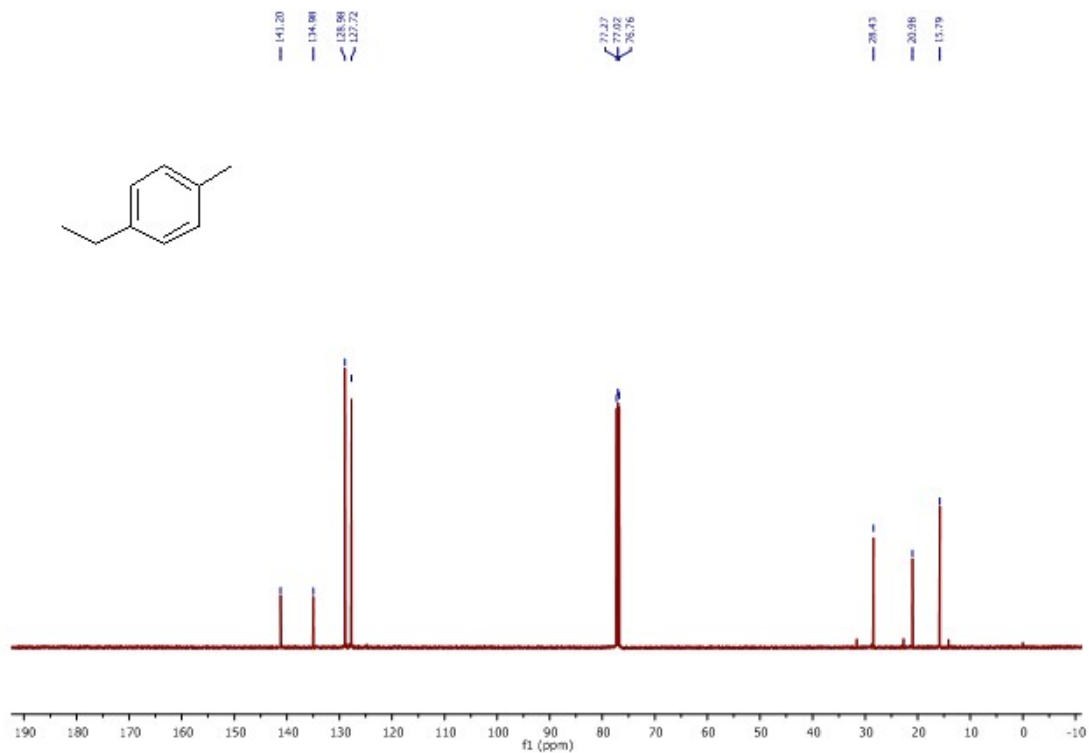

### 5)4-ethylaniline

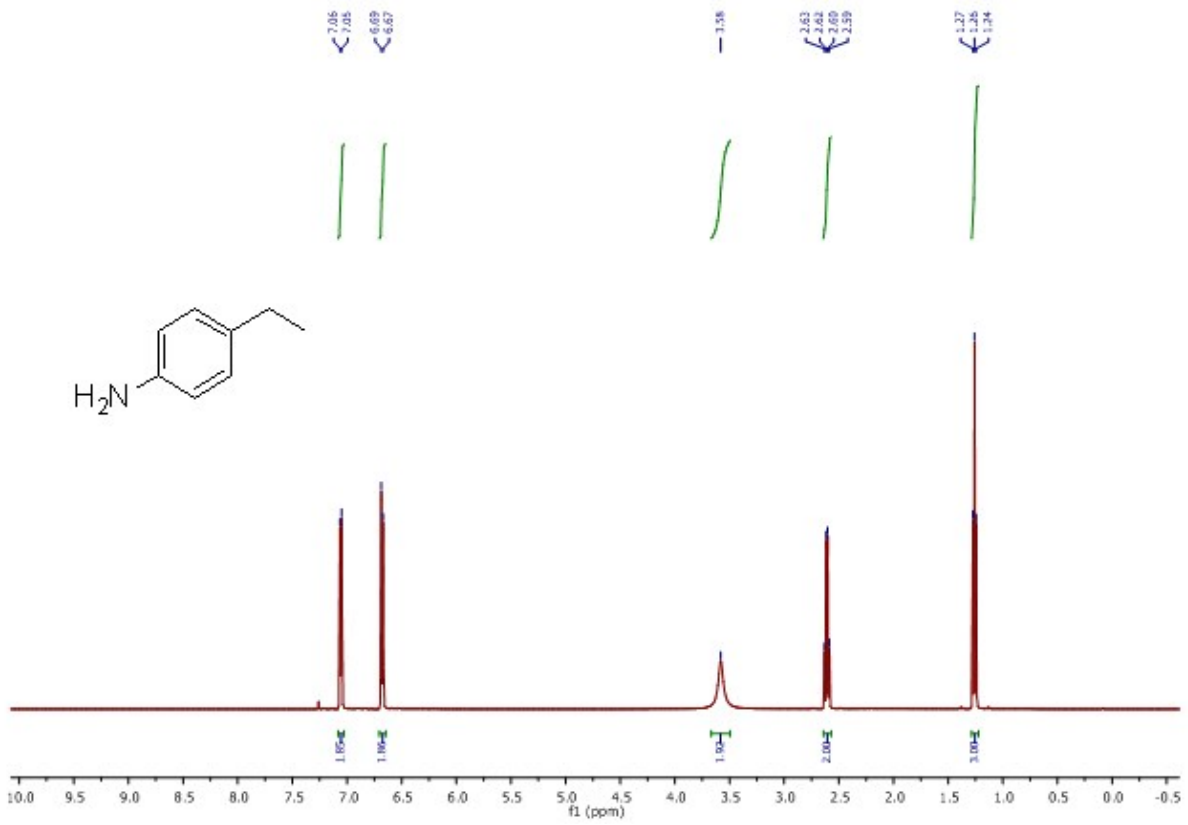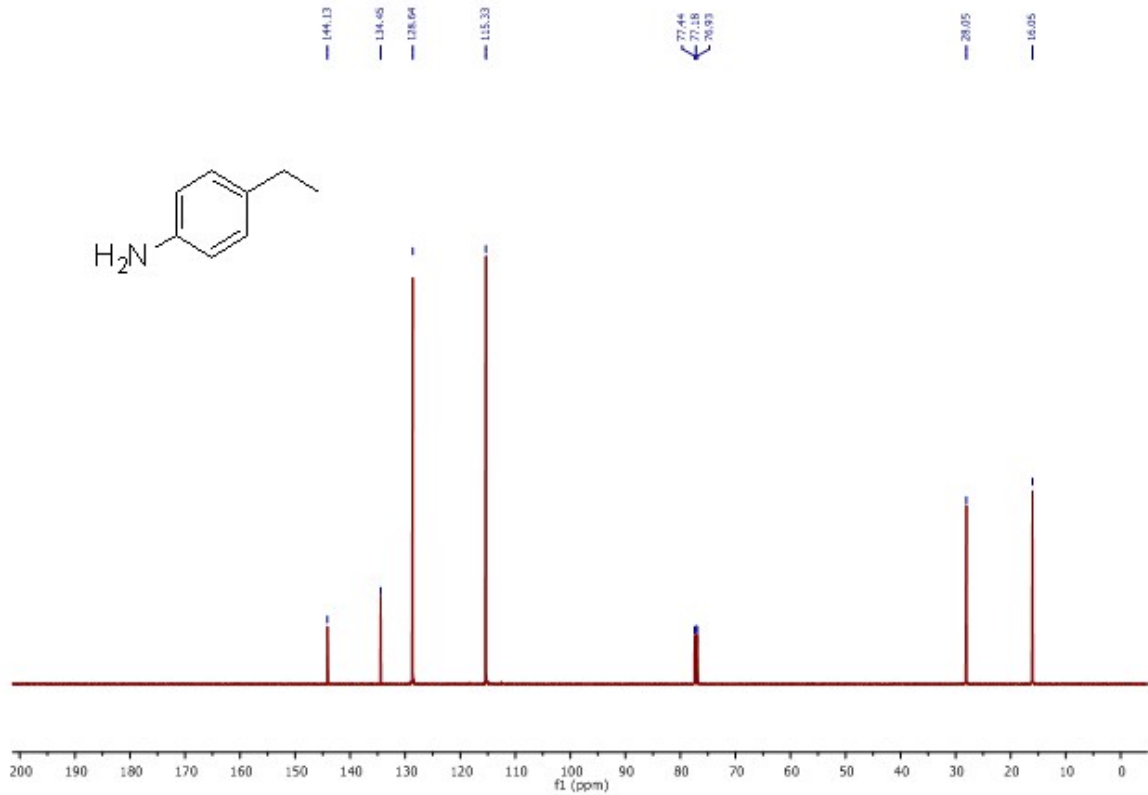

## 6) Propylbenzene

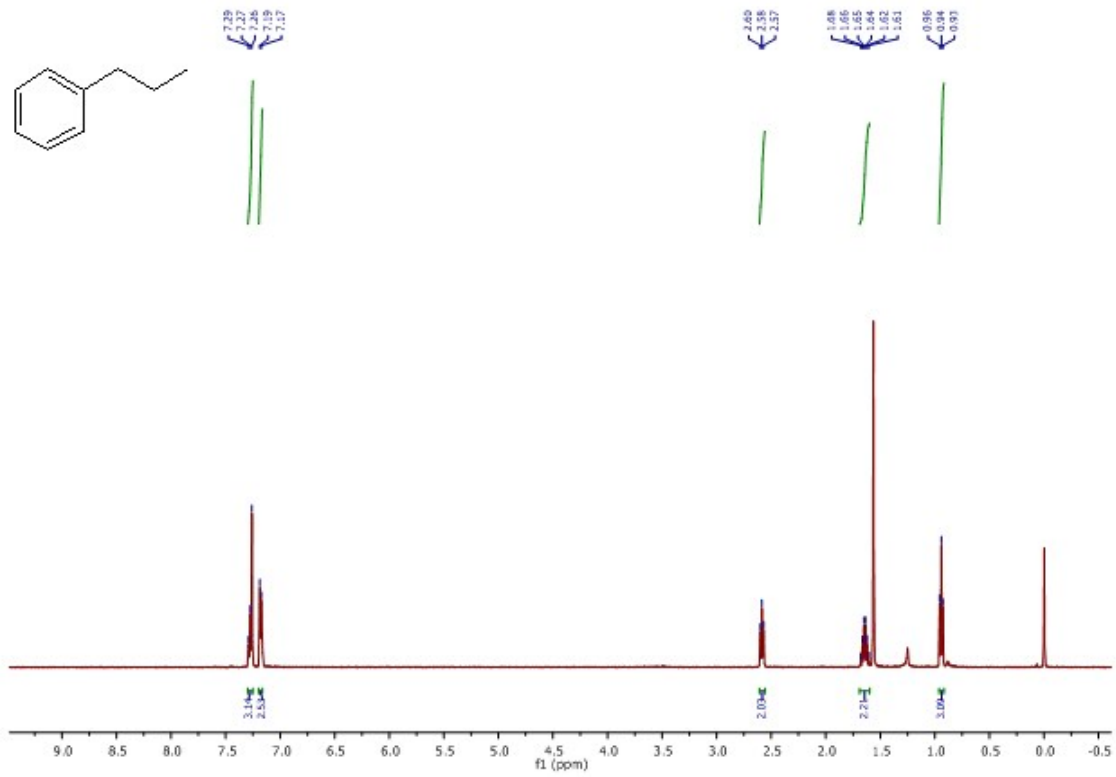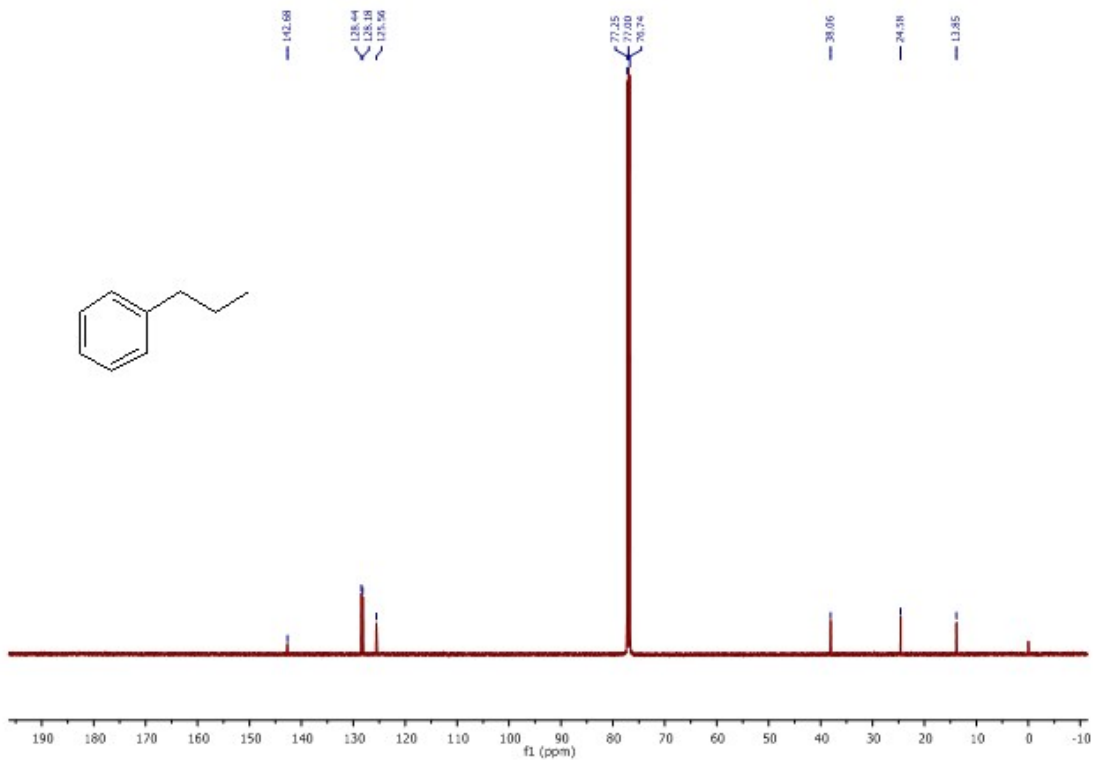

## 7) 4-Propylanisole

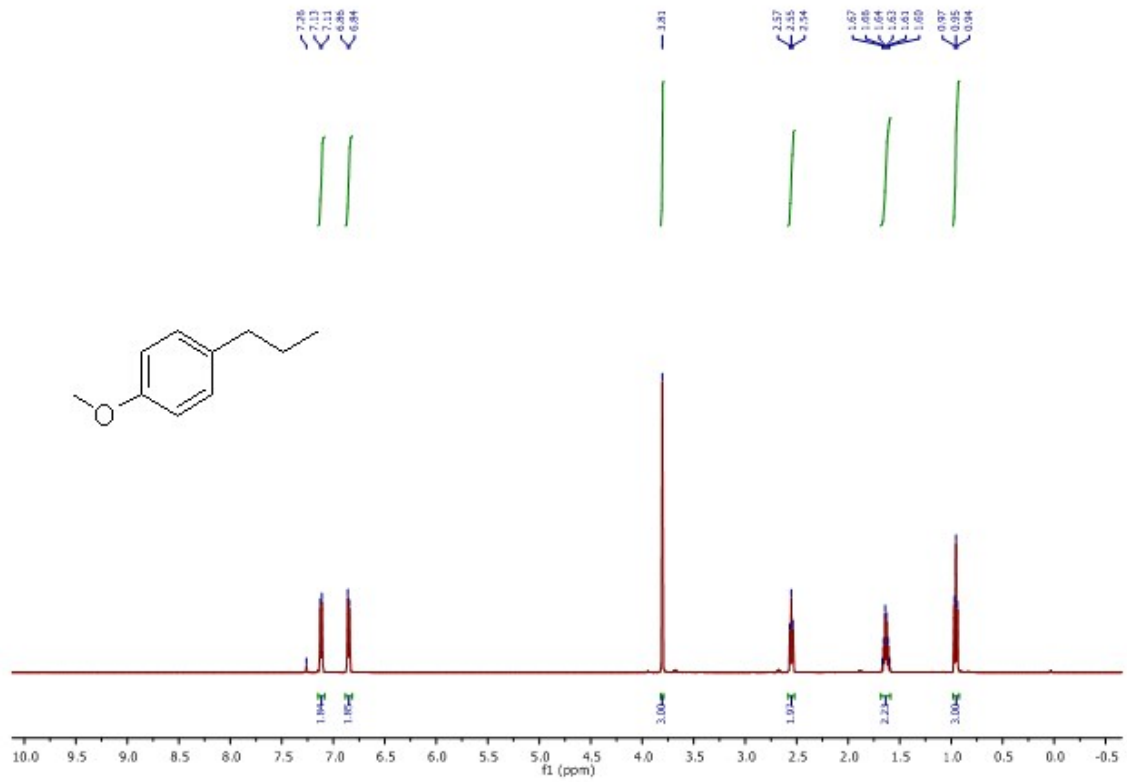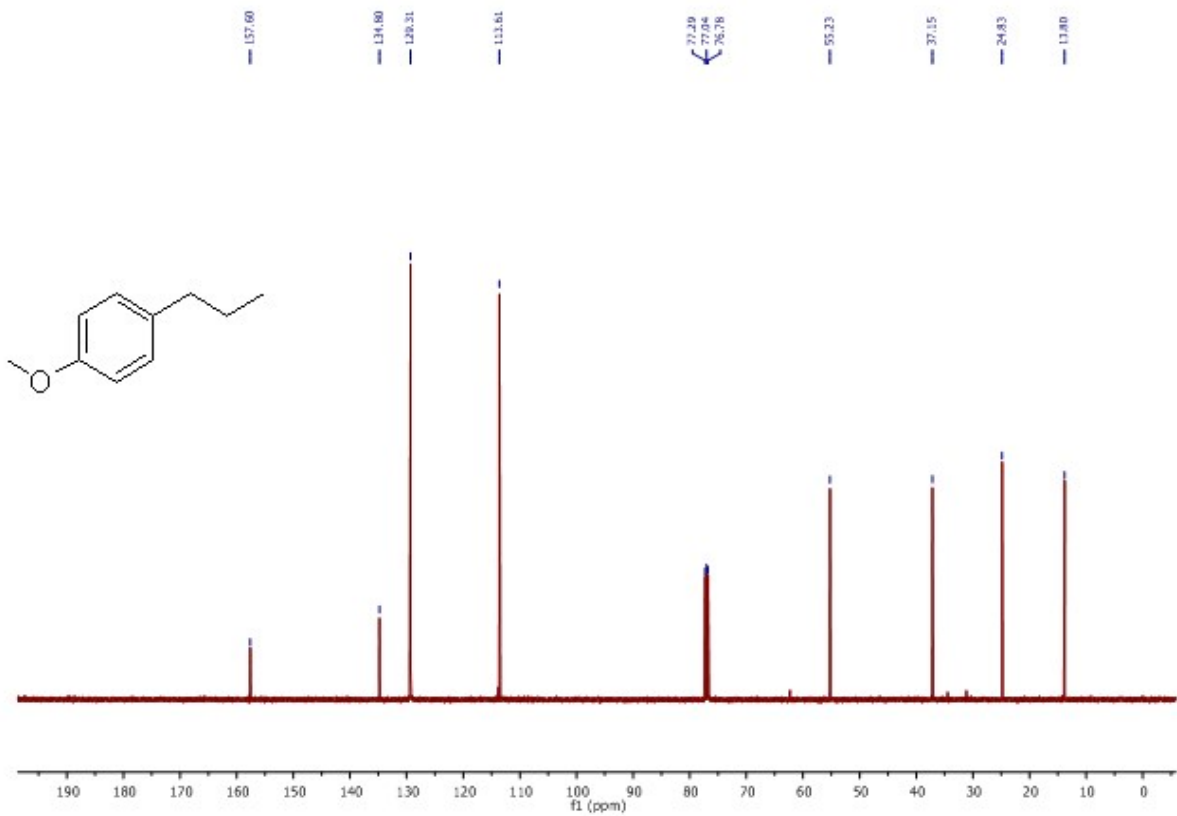

## 8) 2-Methoxy-4-propylphenol

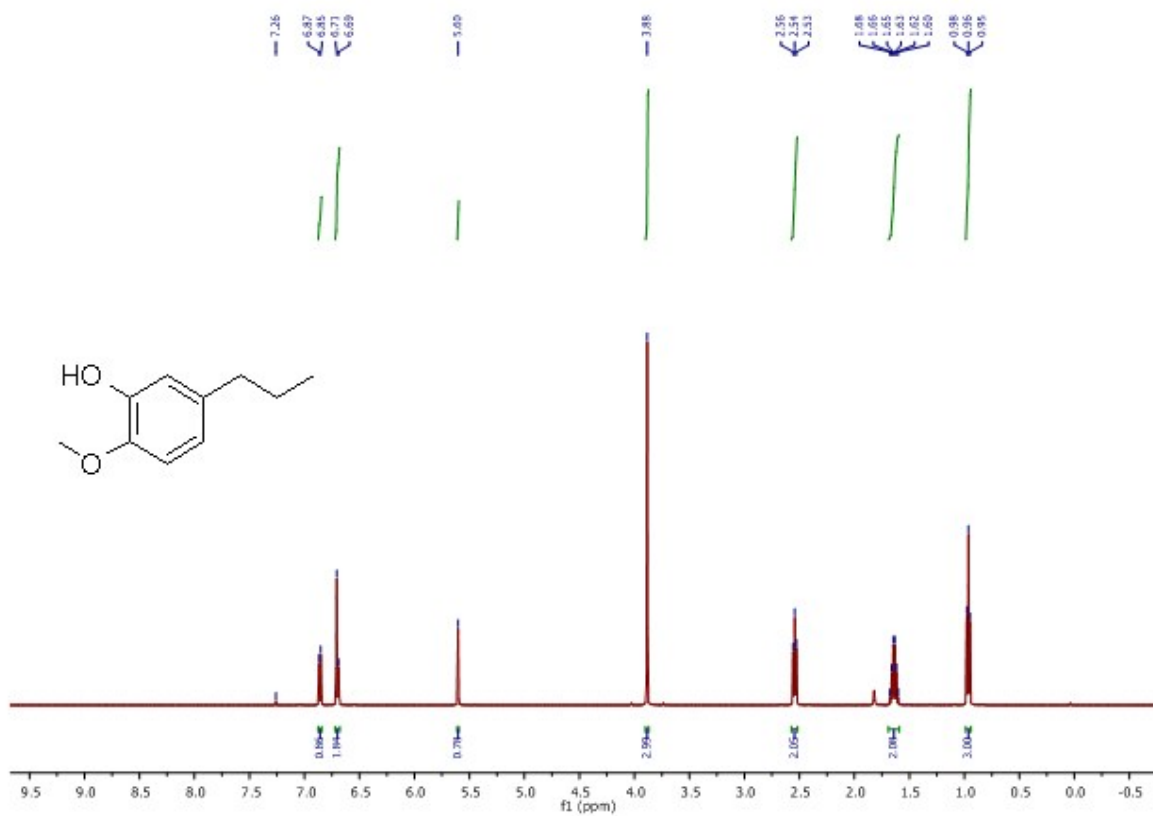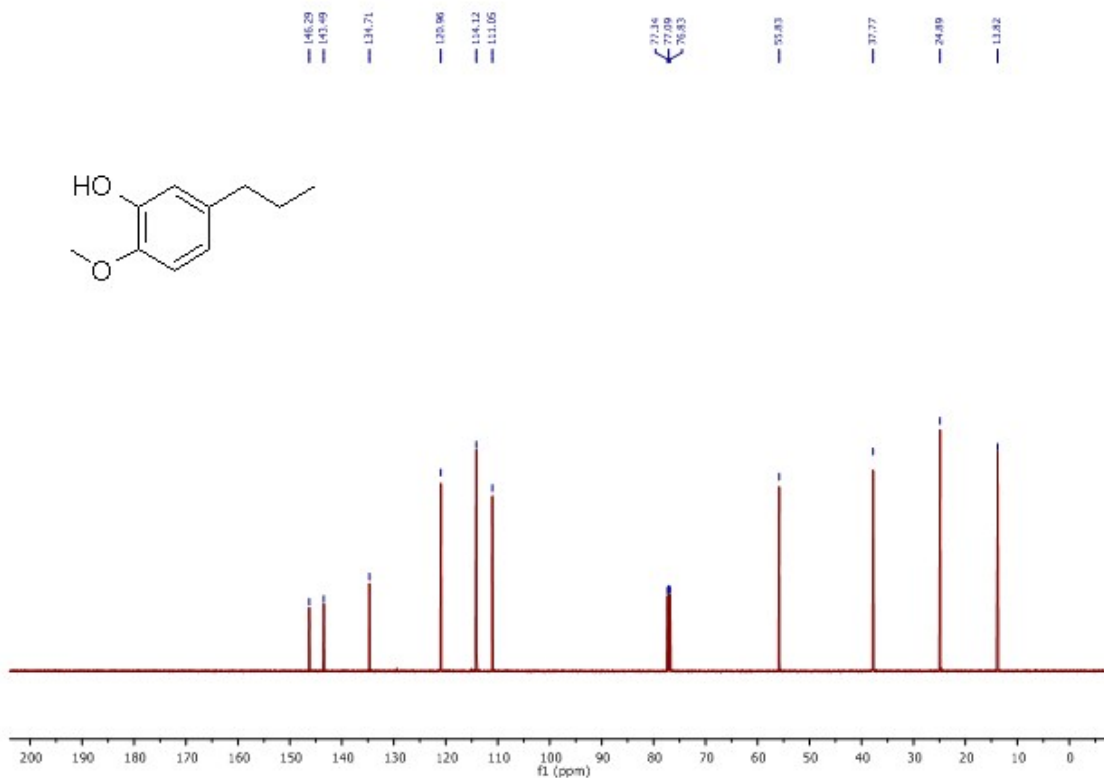

### 9) 1-(*tert*-butyl)-4-ethylbenzene

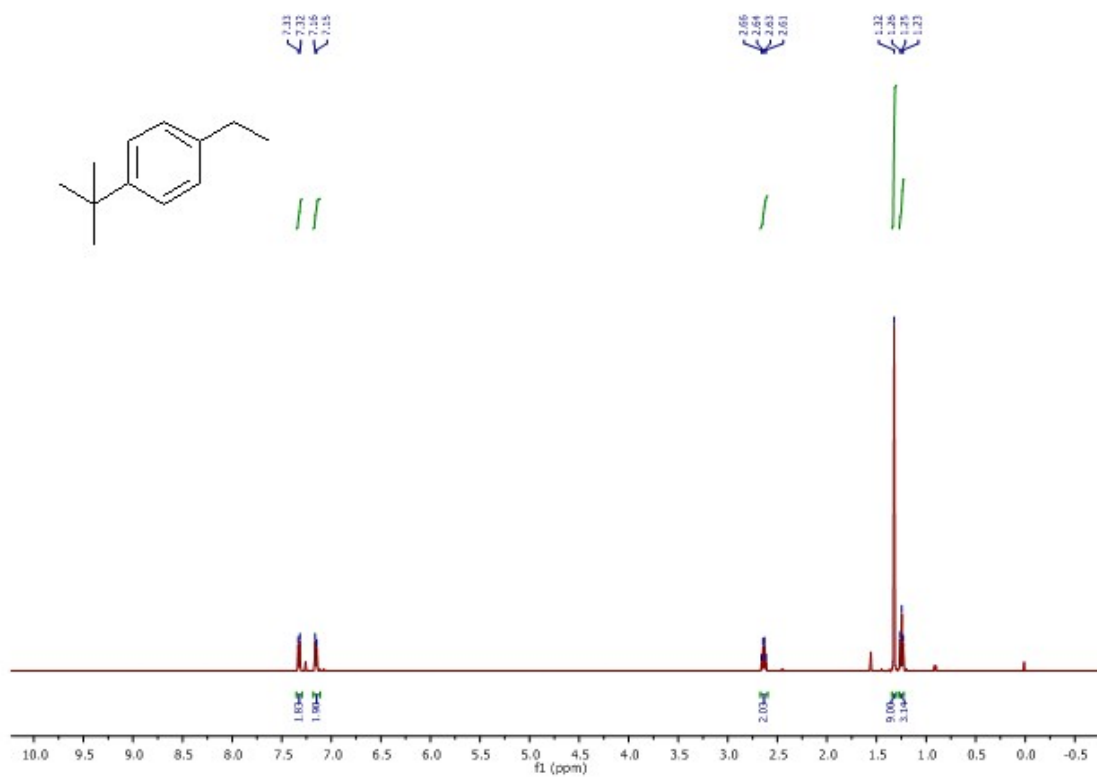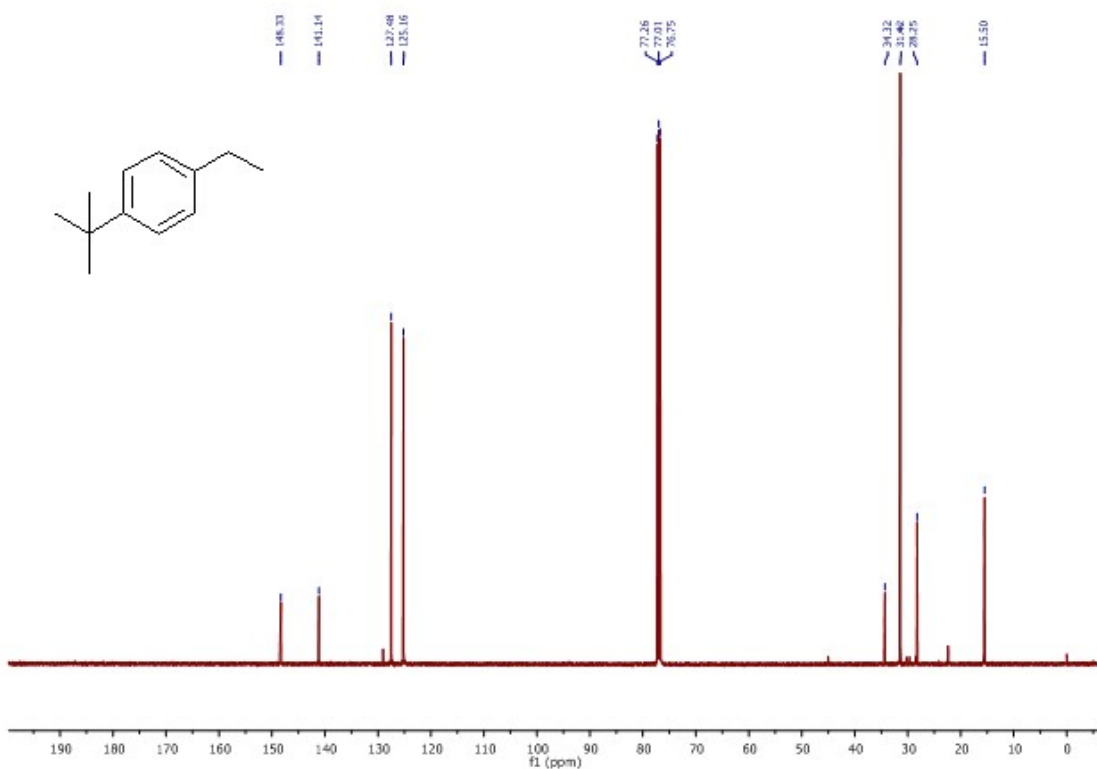

# 10) 2-ethylpyridine

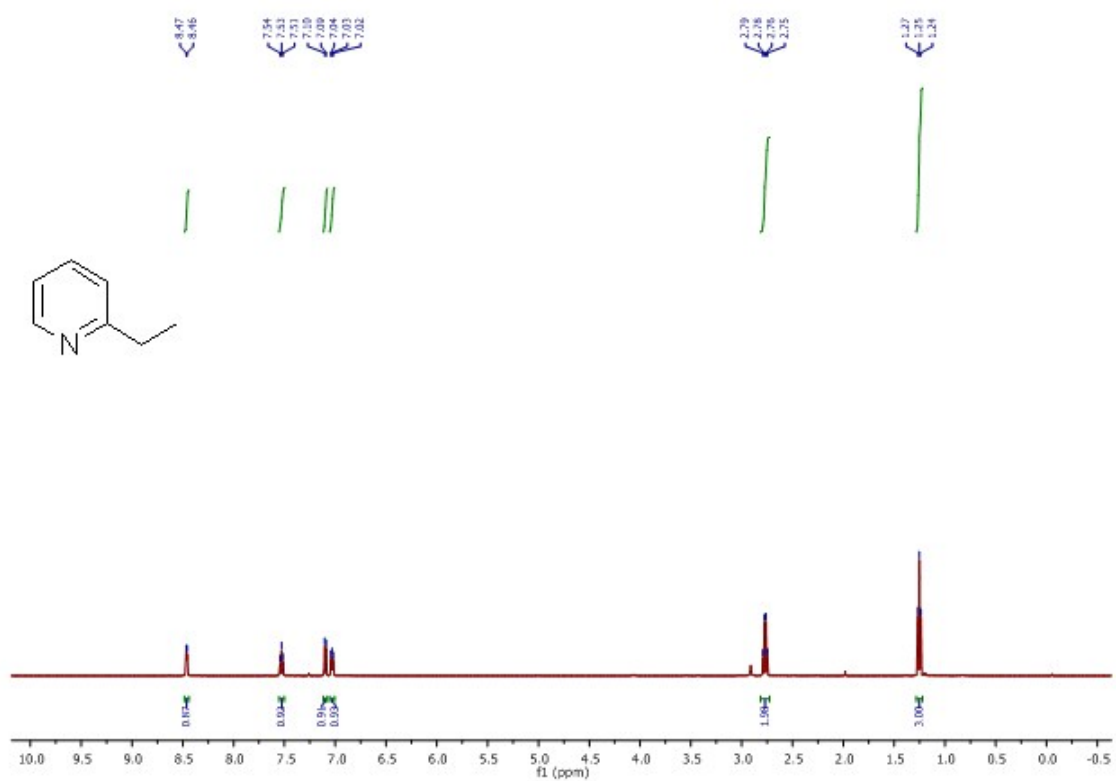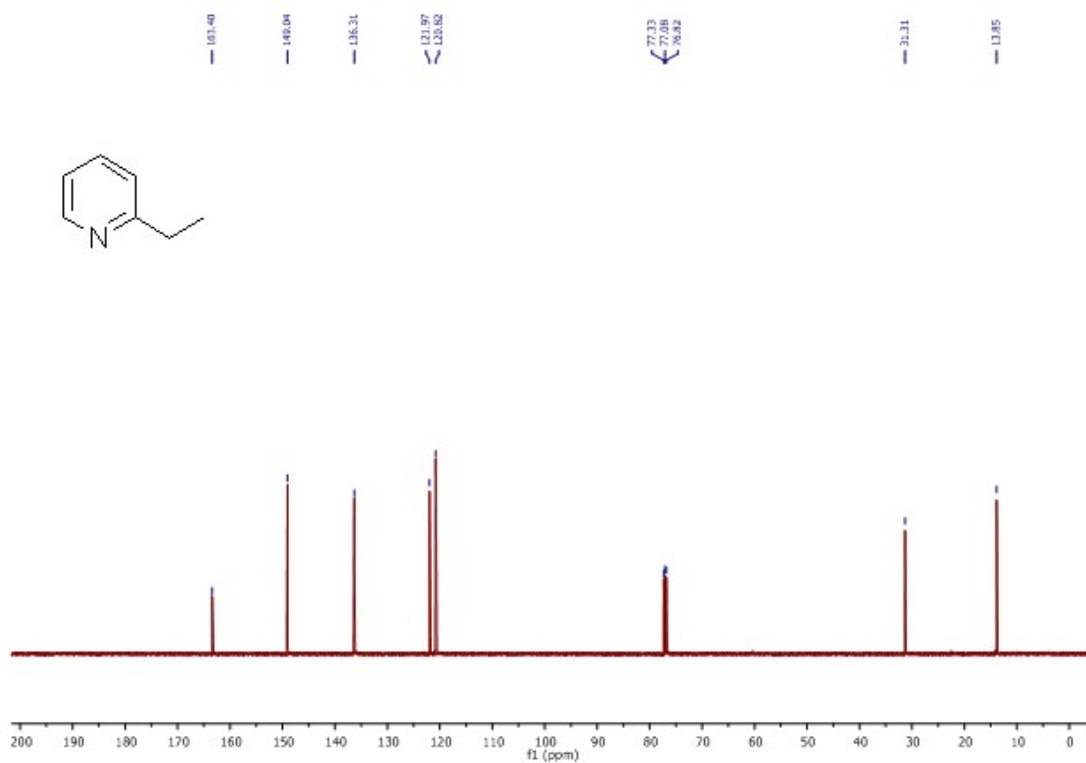



# NMR spectra of amines

## 1) Aniline

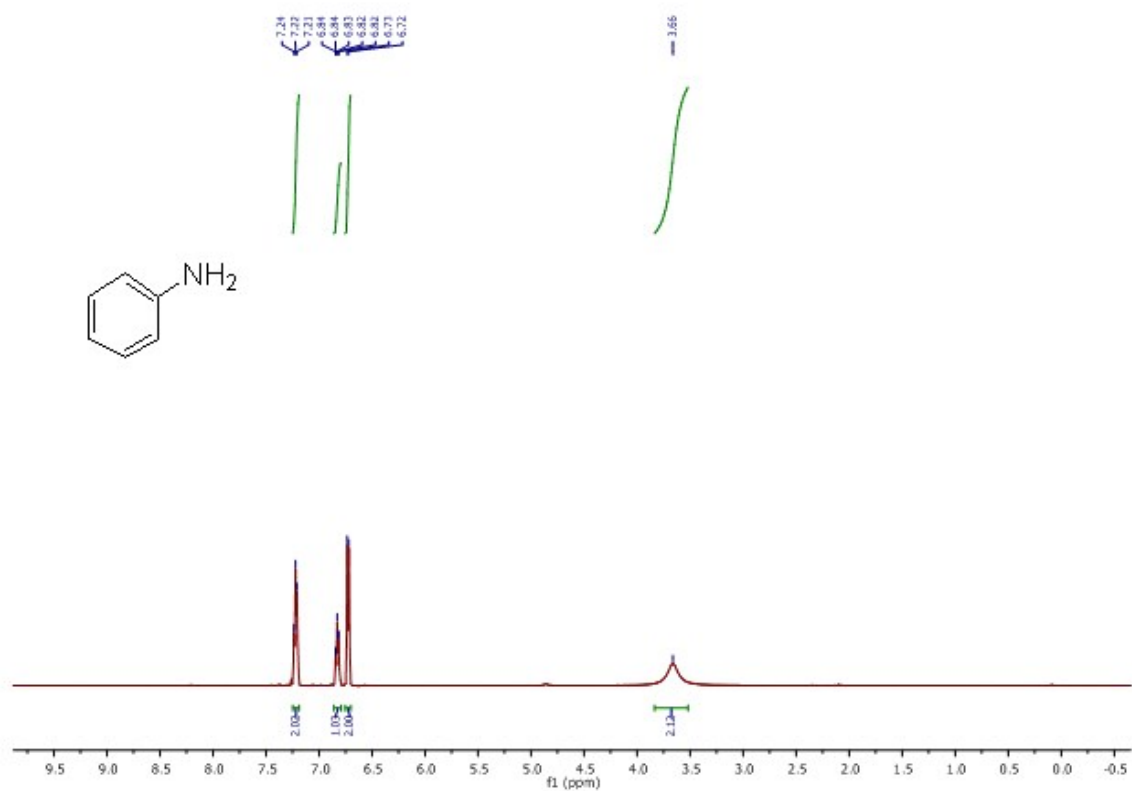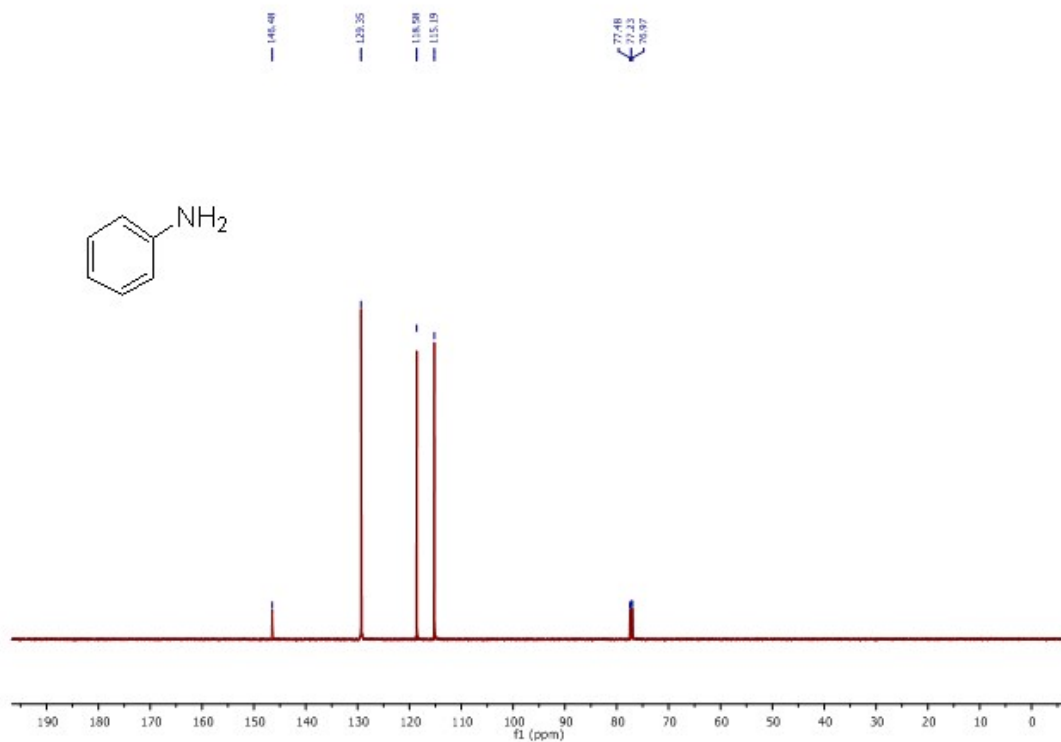

## 2) 2-Chloroaniline

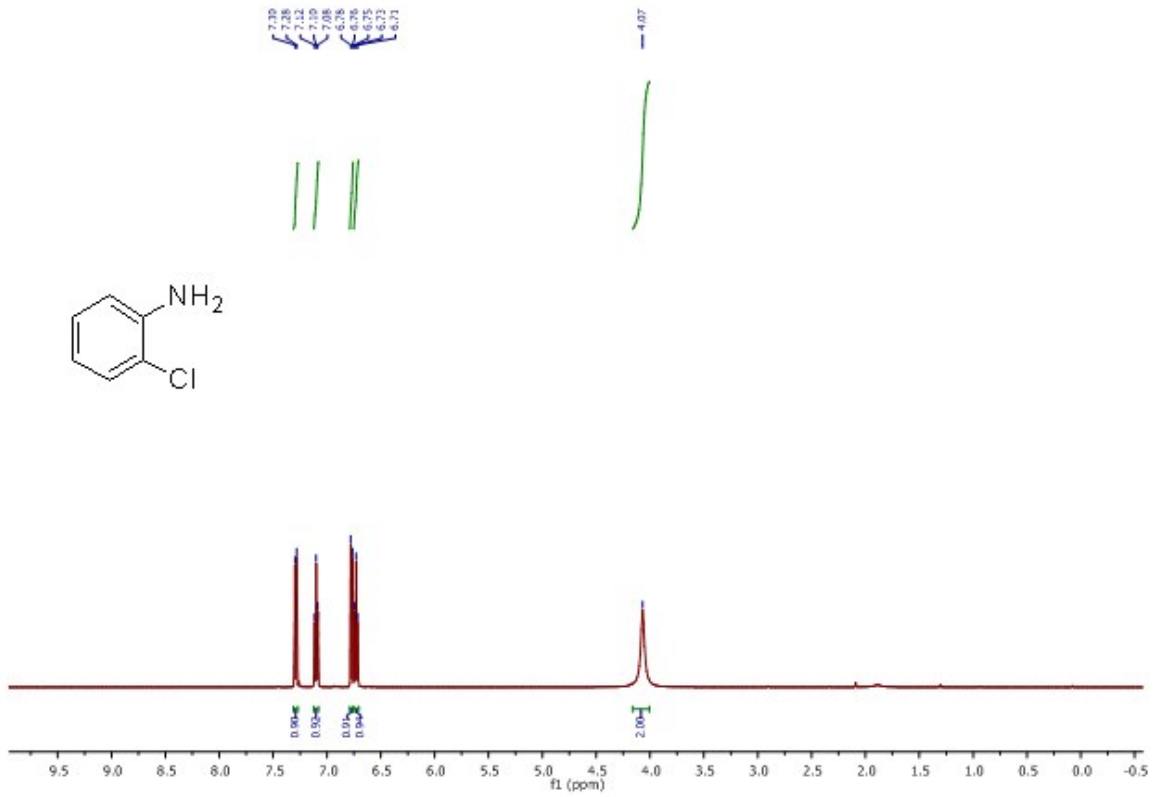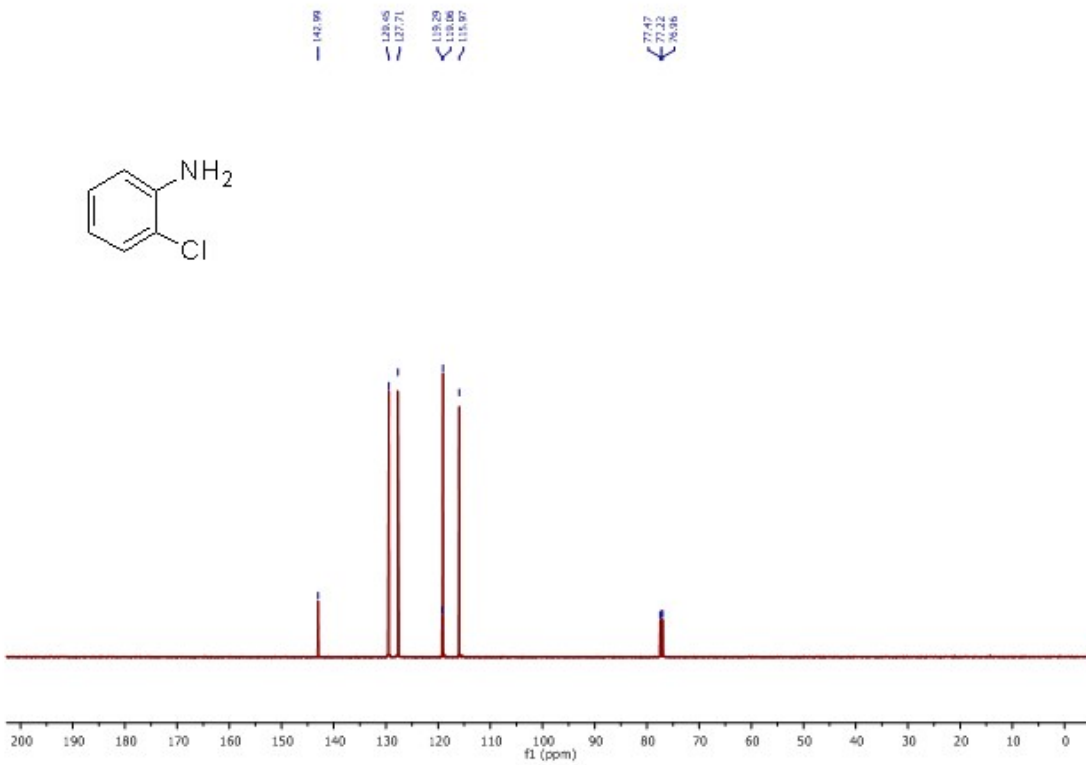

### 3) 2-Fluoroaniline

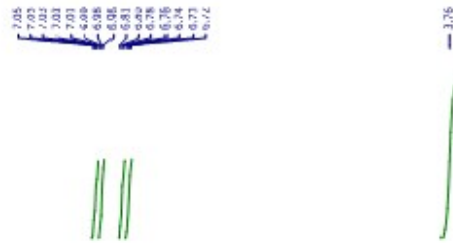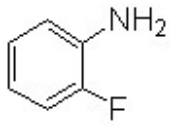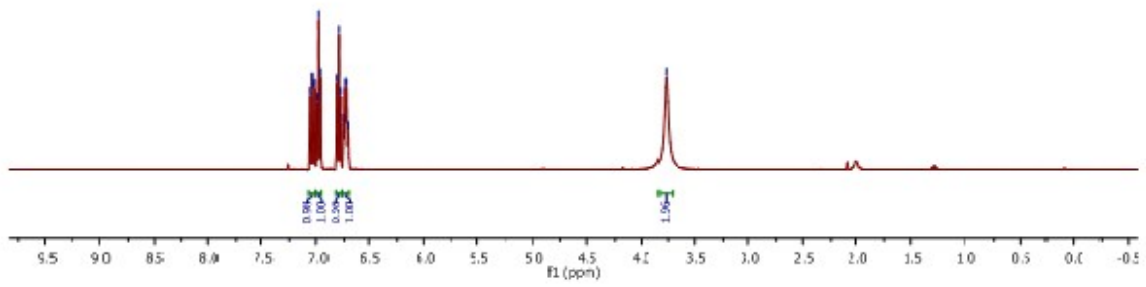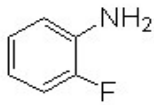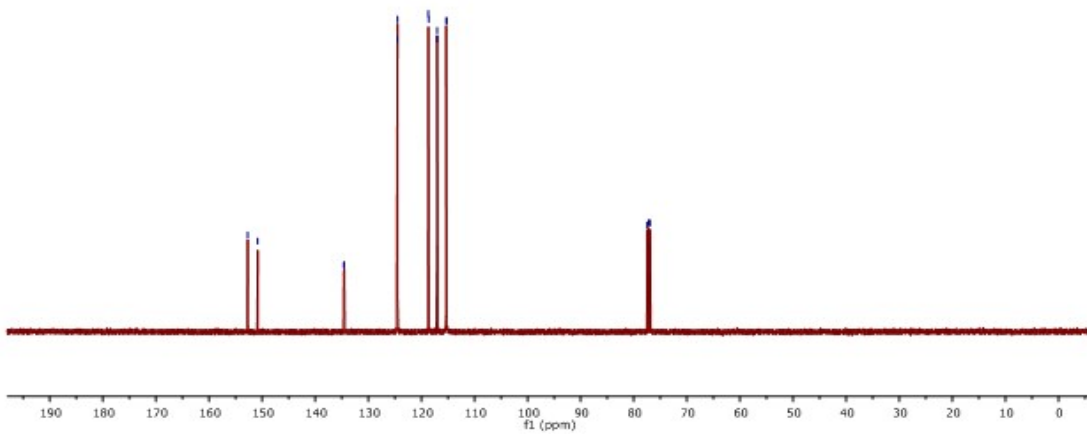

#### 4) 4-Iodoaniline

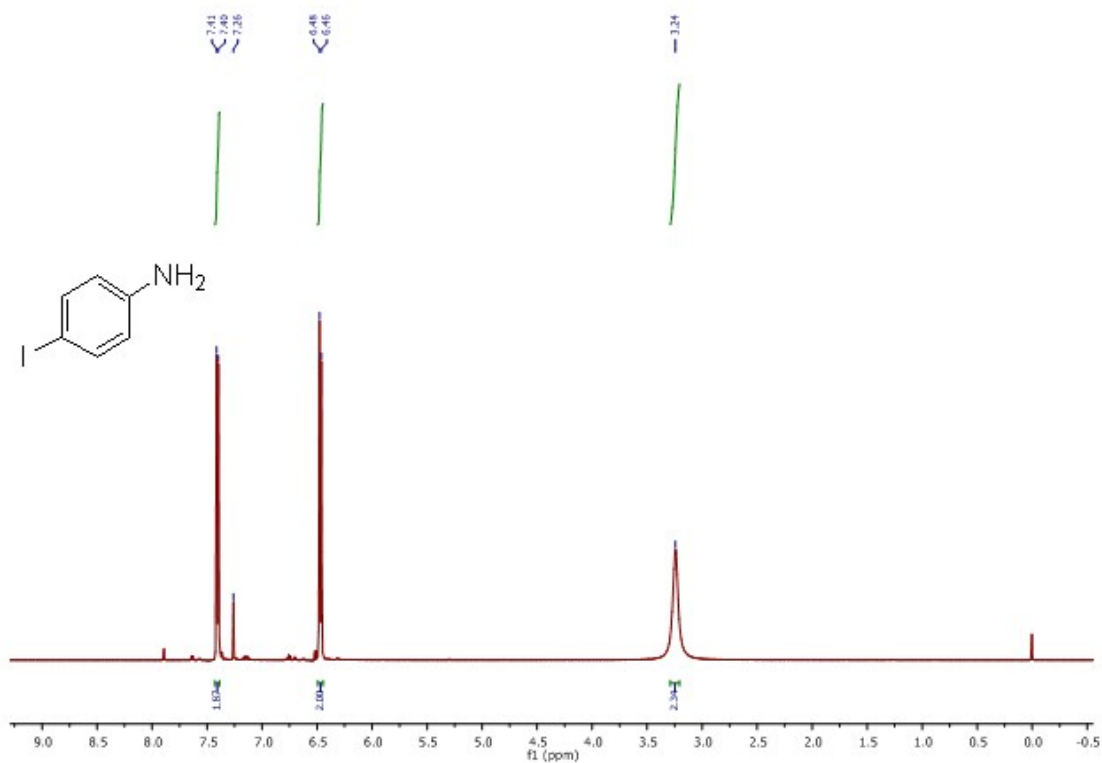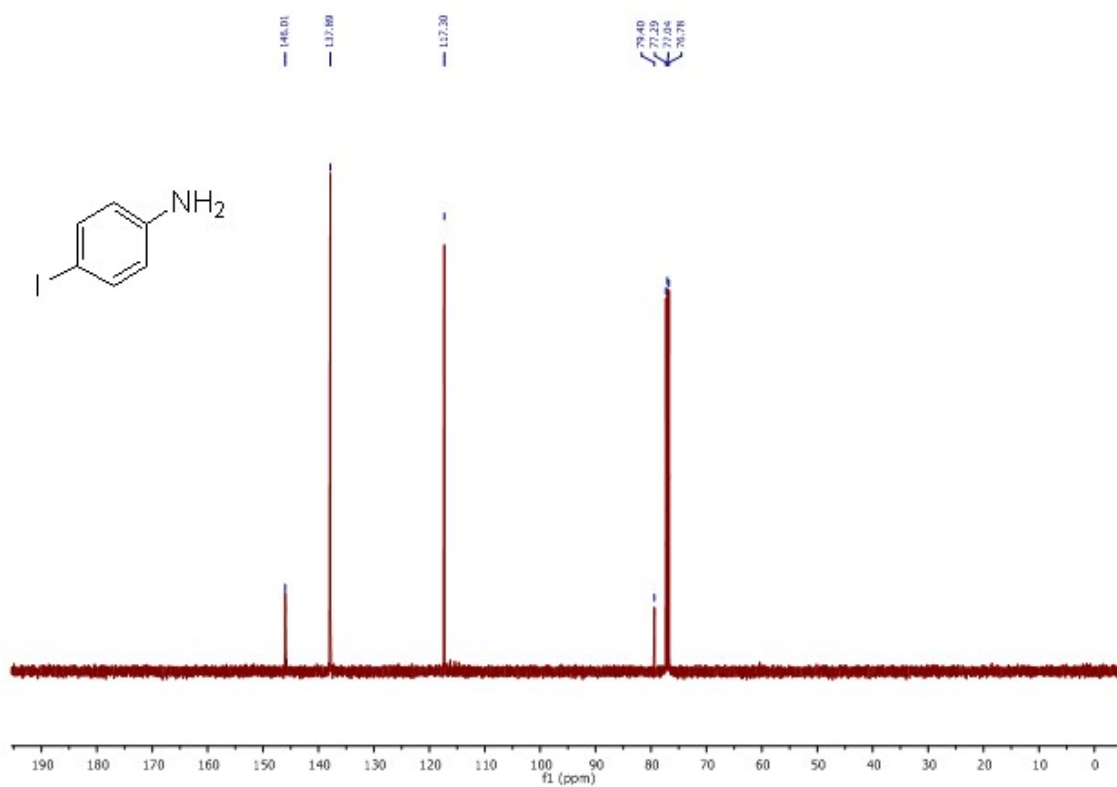

### 5) *o*-Toluidine

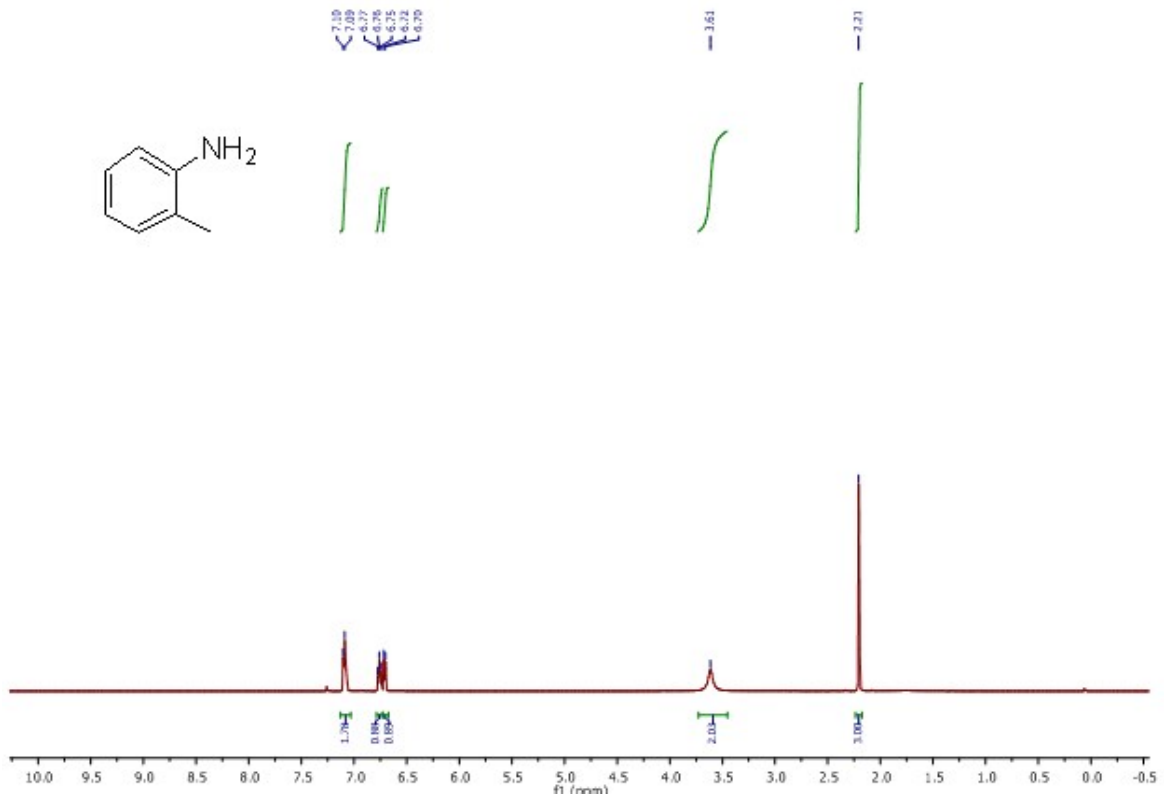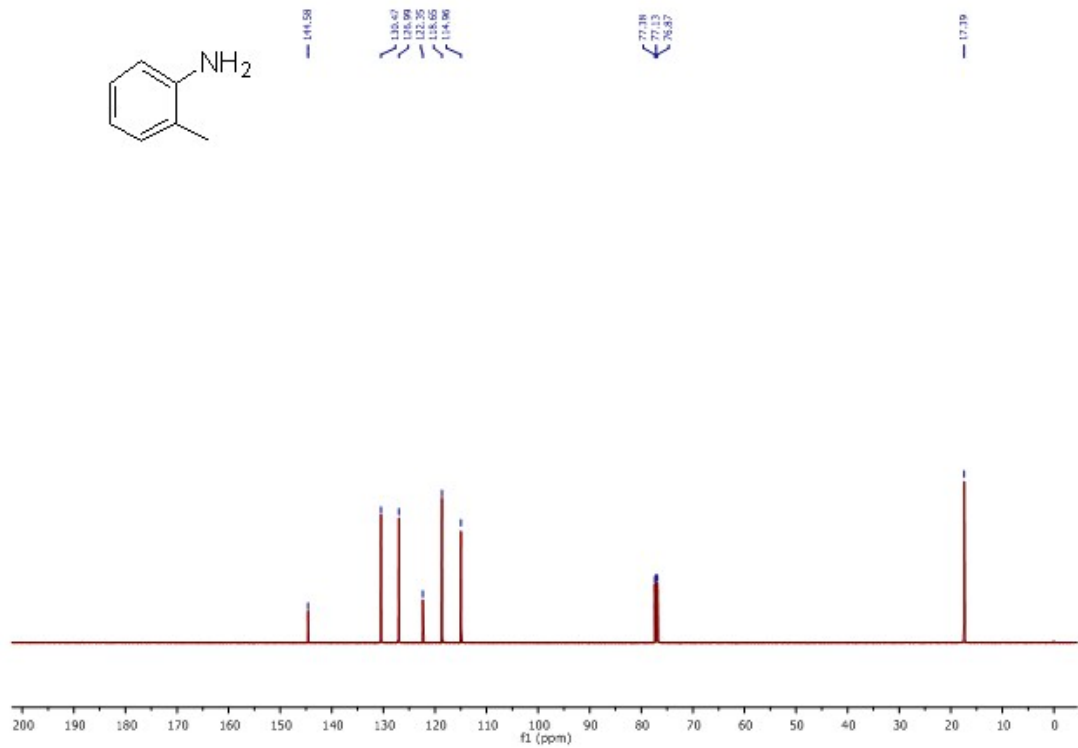

## 6) *m*-Toluidine

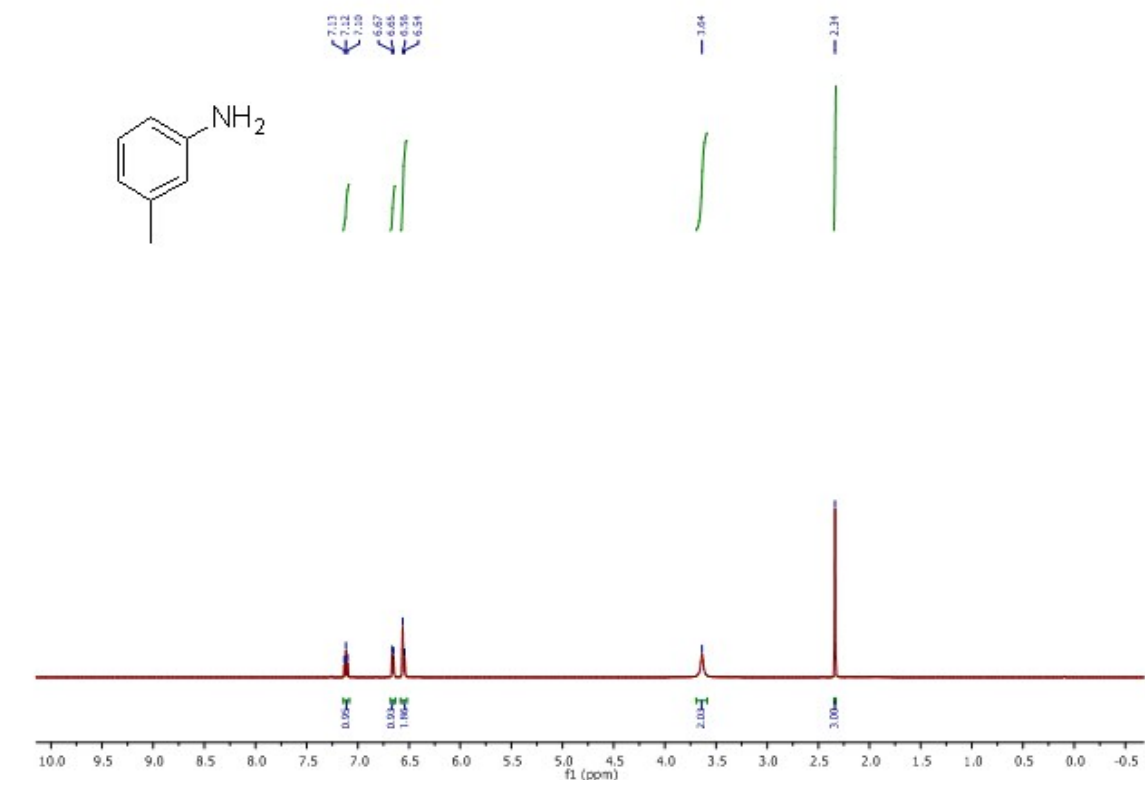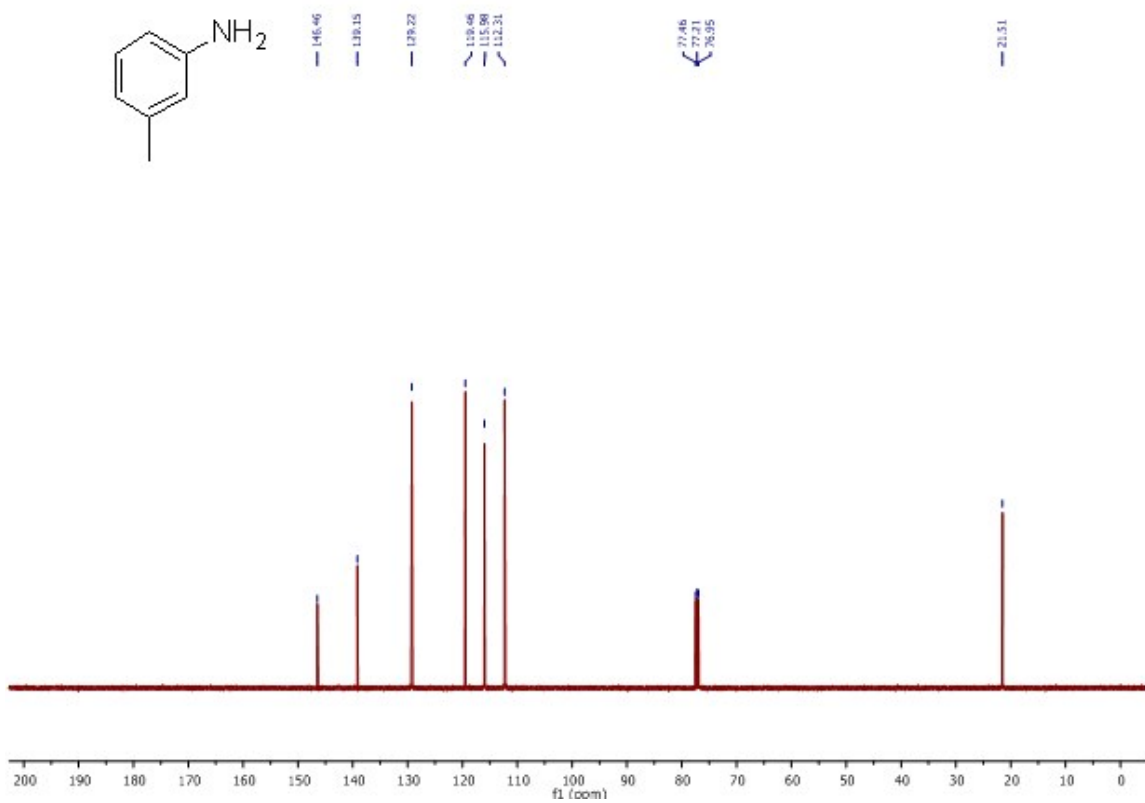

# 7) *p*-Toluidine

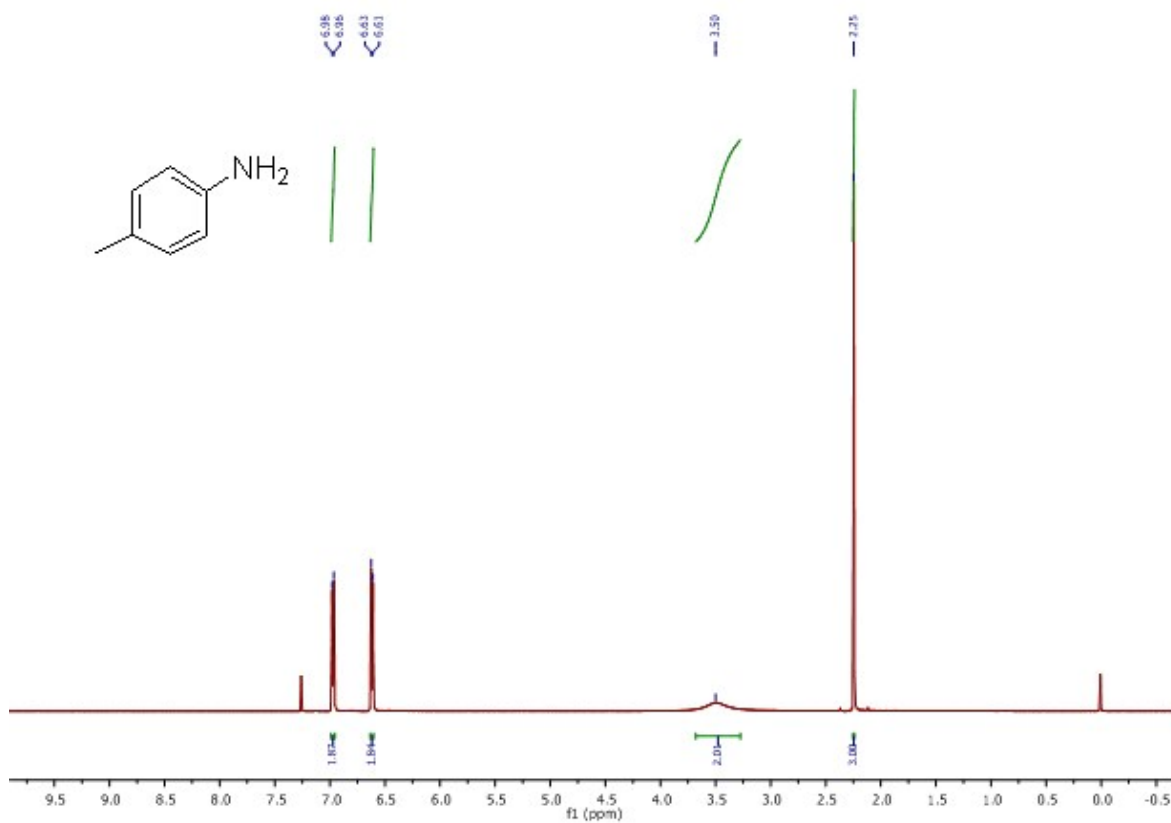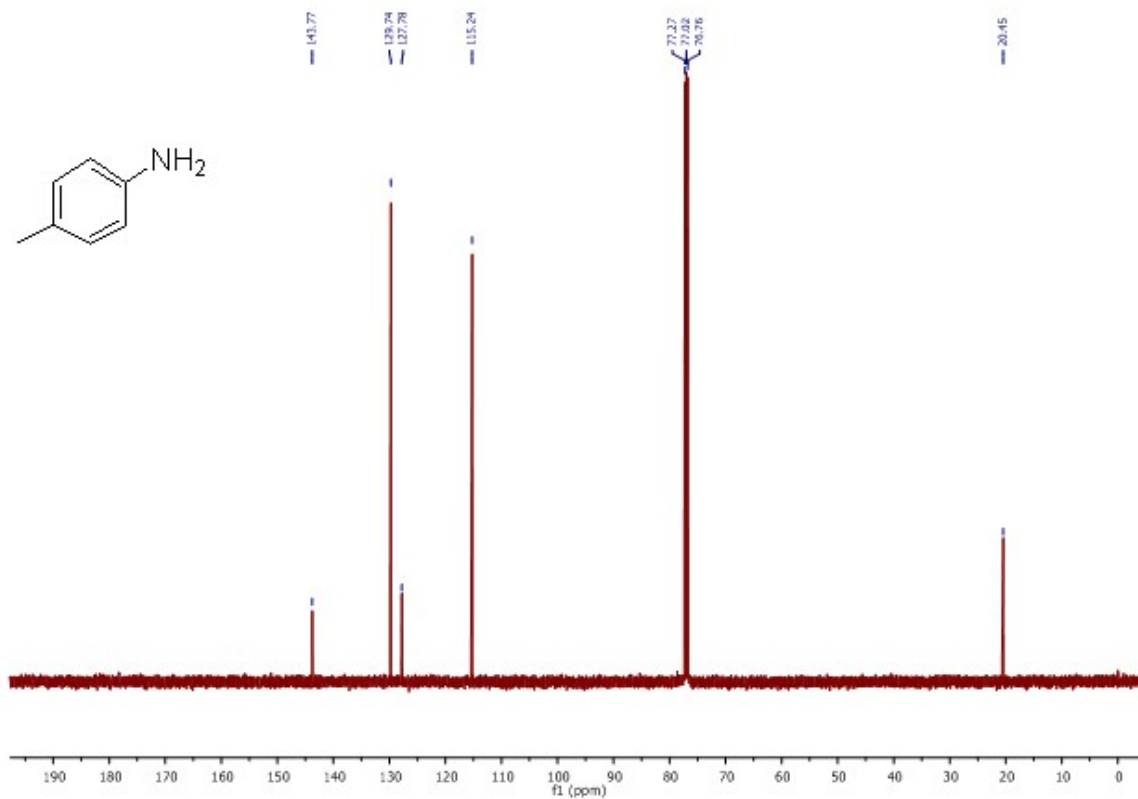

### 8) *p*-Anisidine

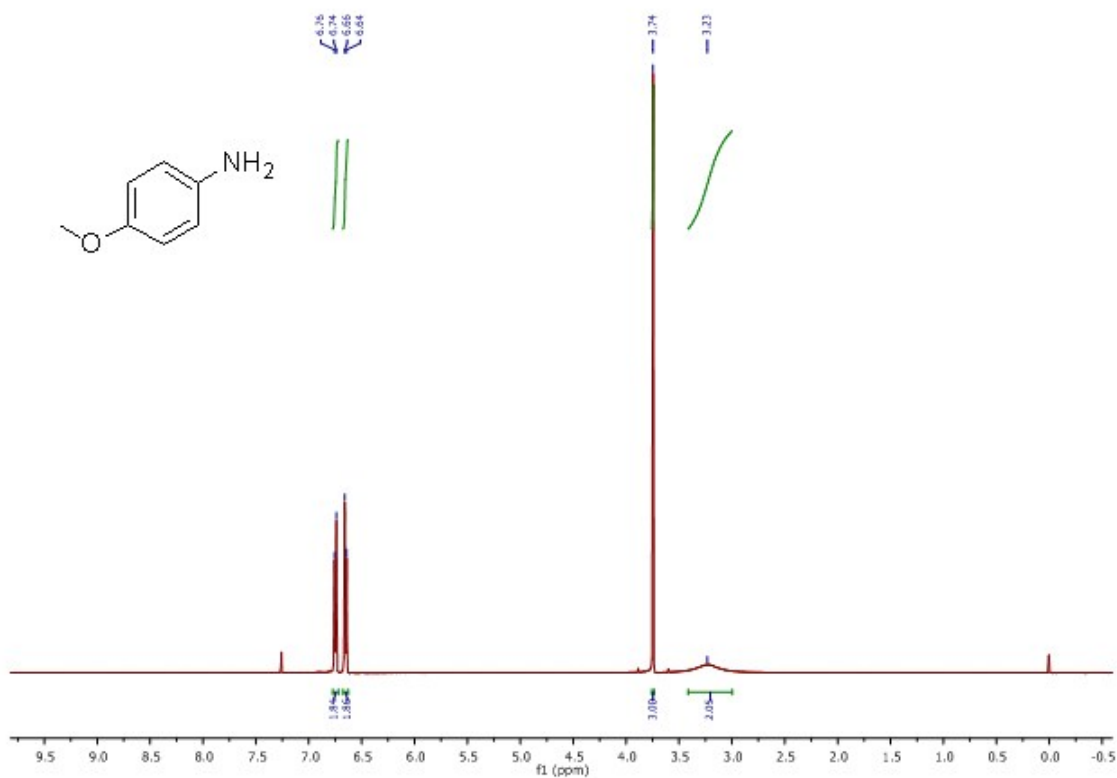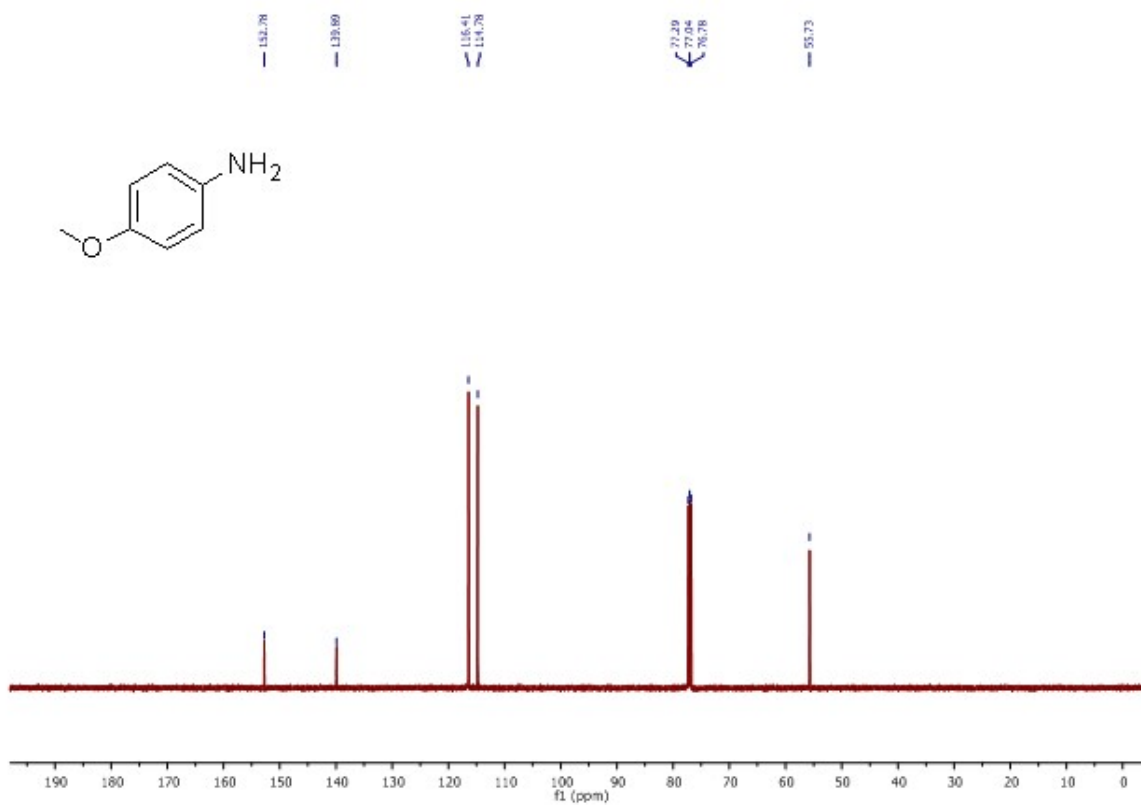



## 9) *m*-Aminophenol

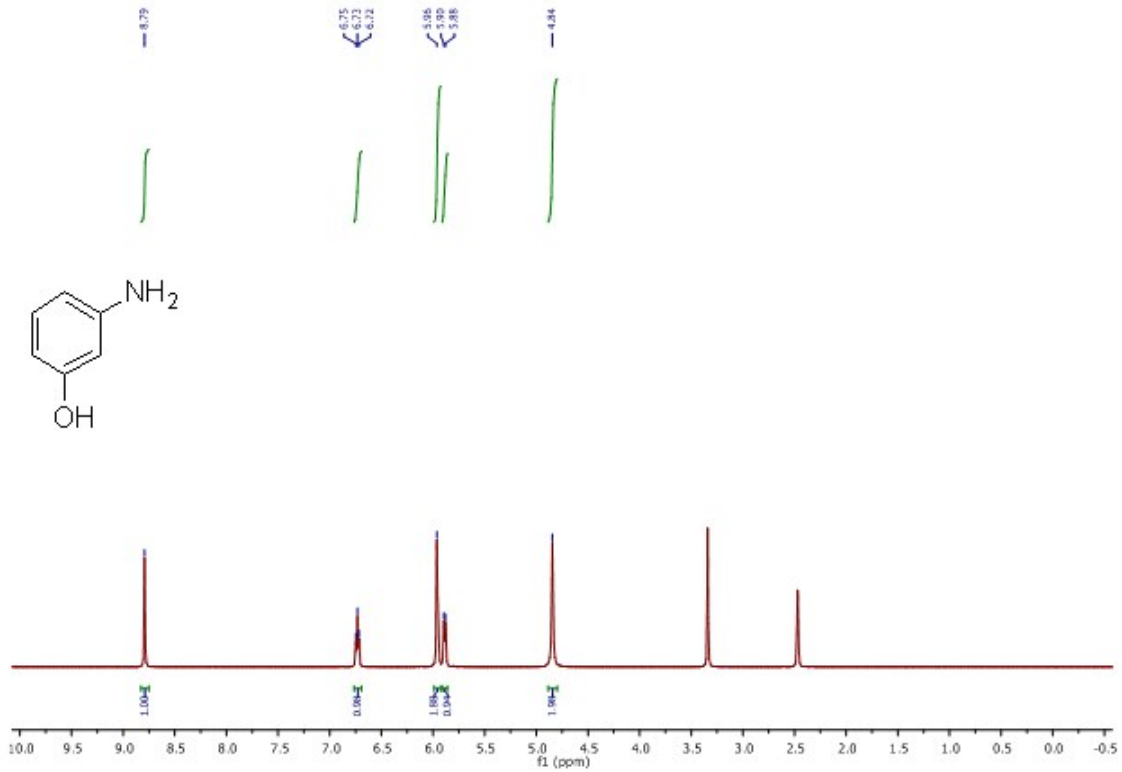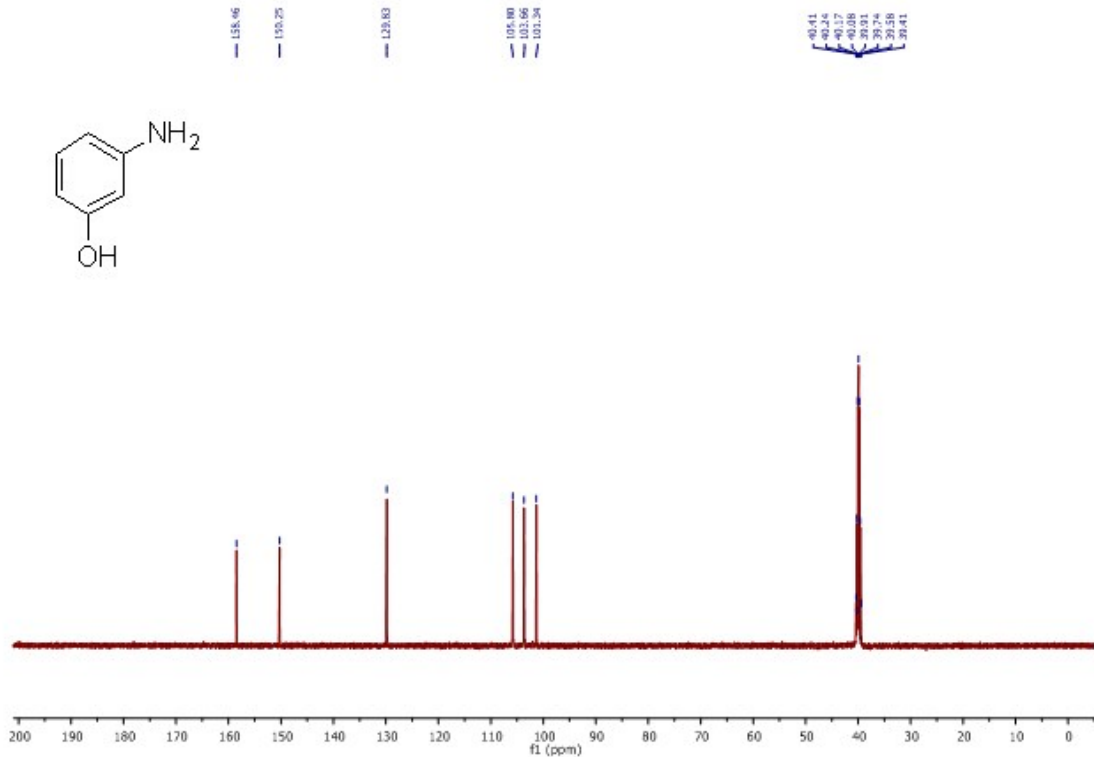

# 10) *p*-Aminophenol

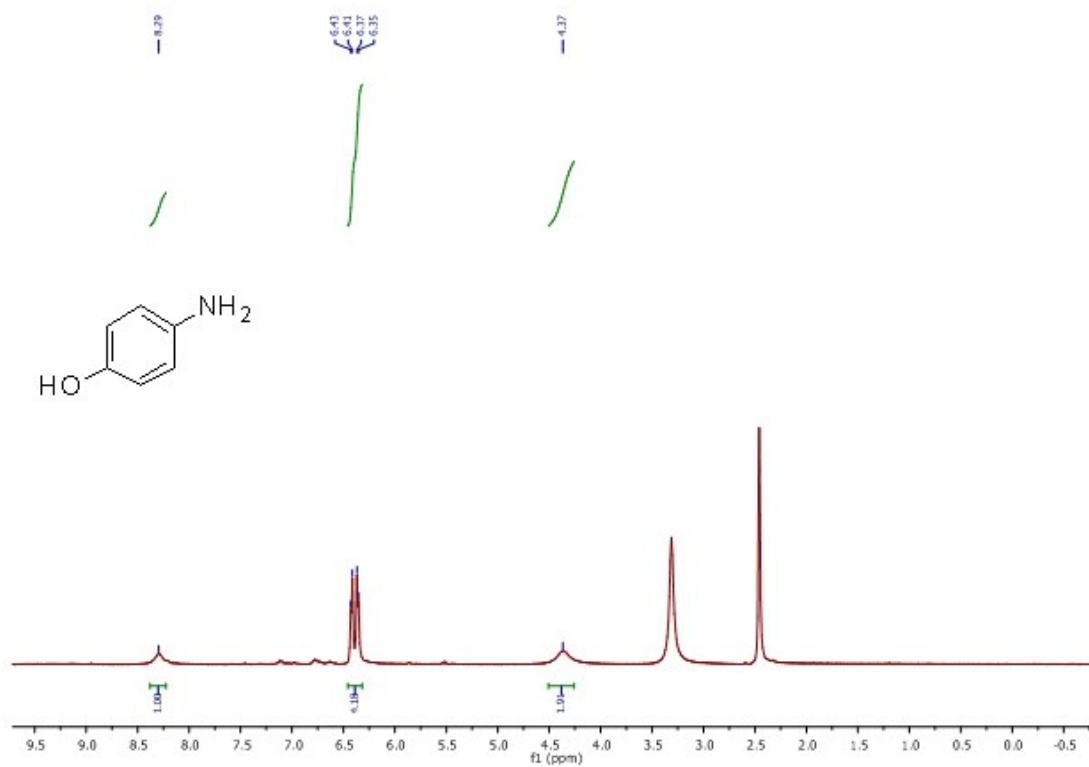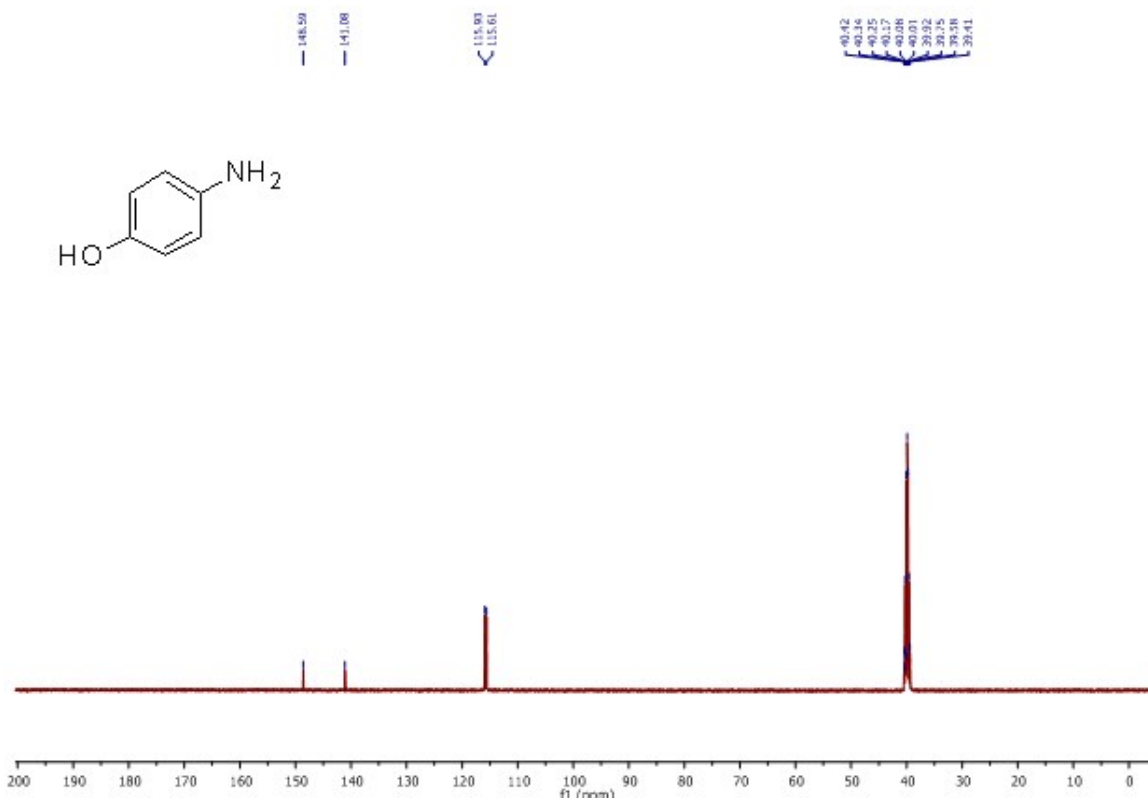

# 11) 2-Aminobenzylalcohol

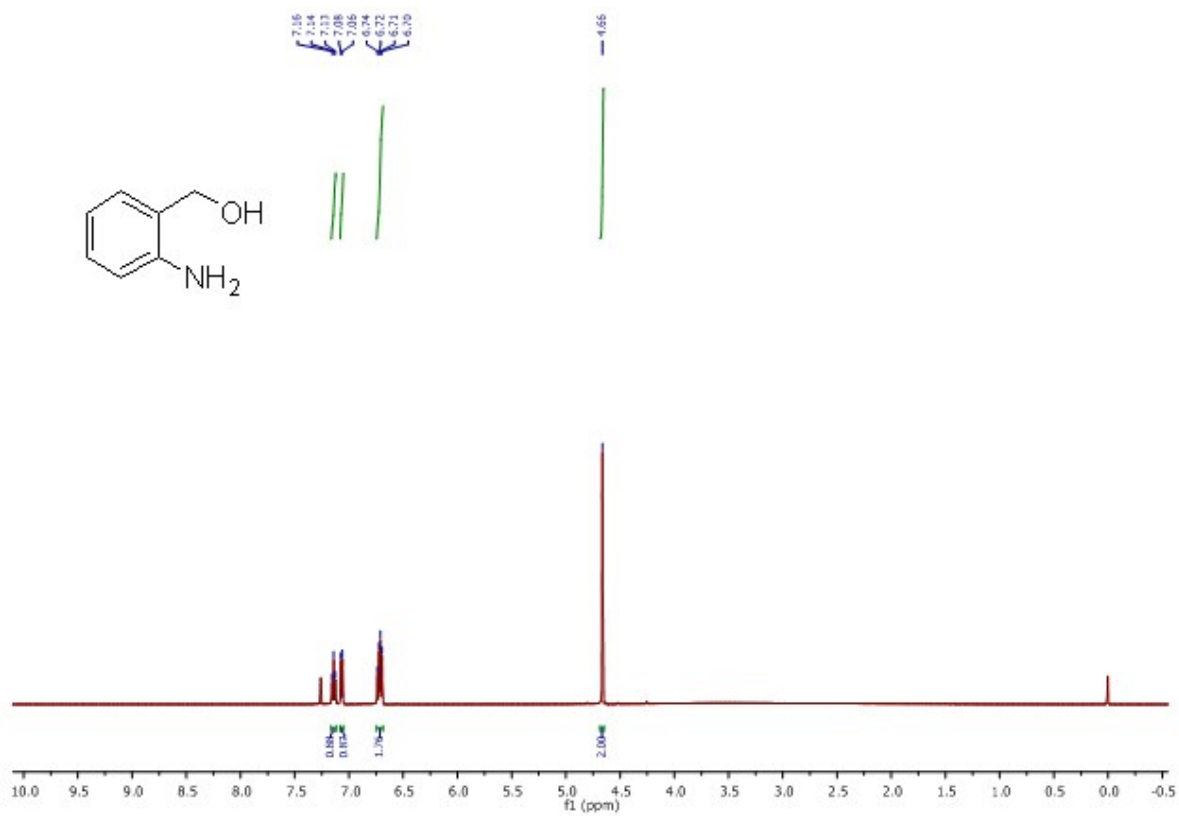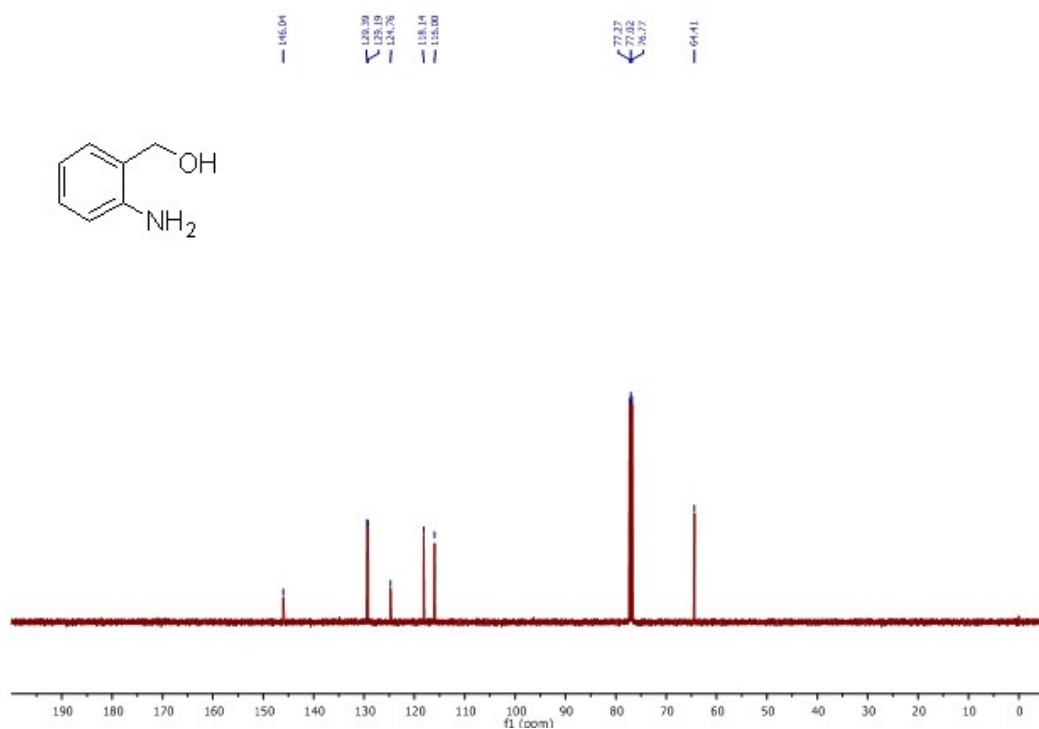

## 12) *o*-Phenylenediamine

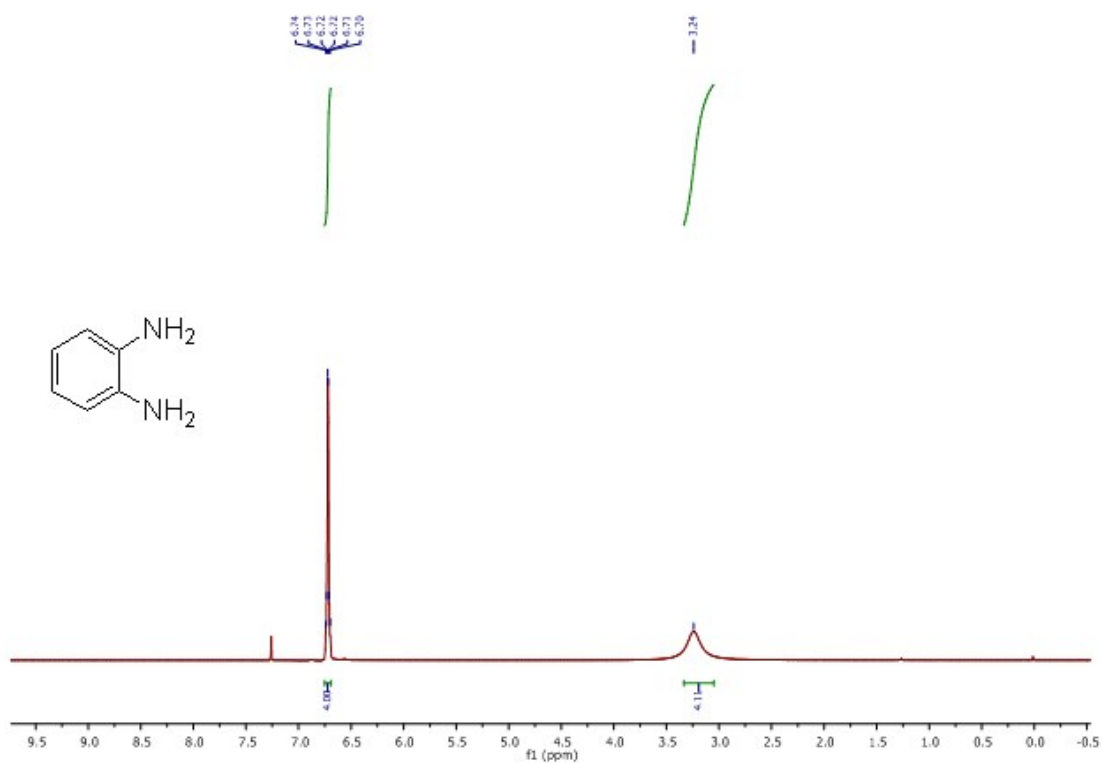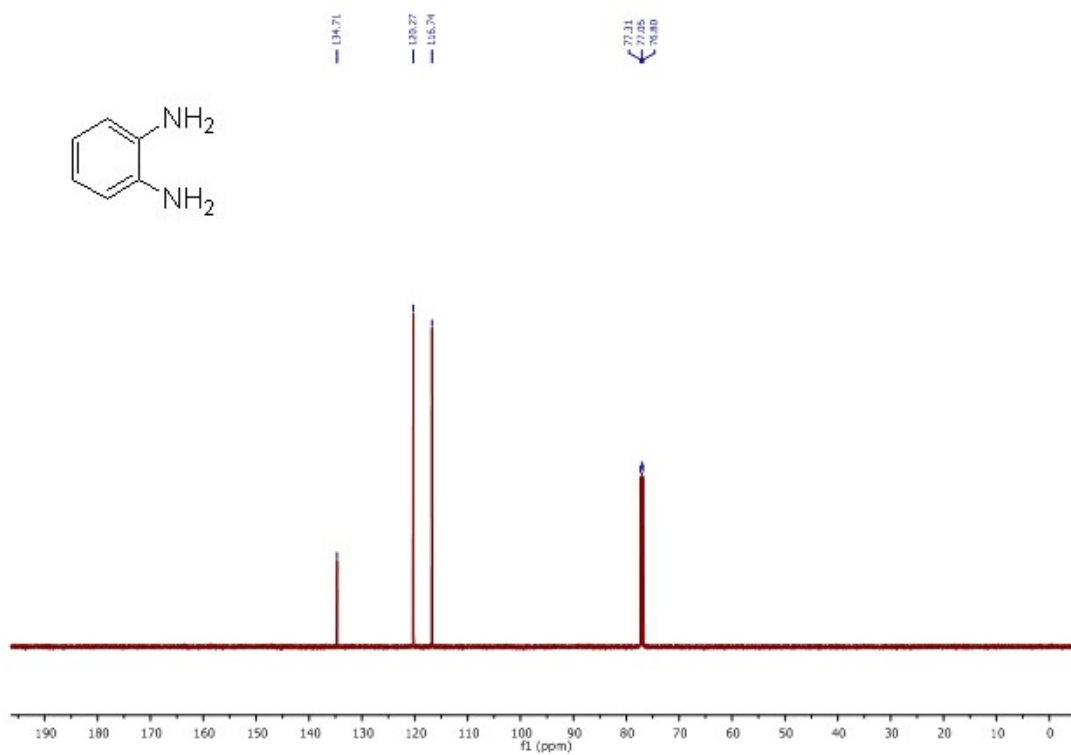

### 13) 4-Aminobenzonitrile

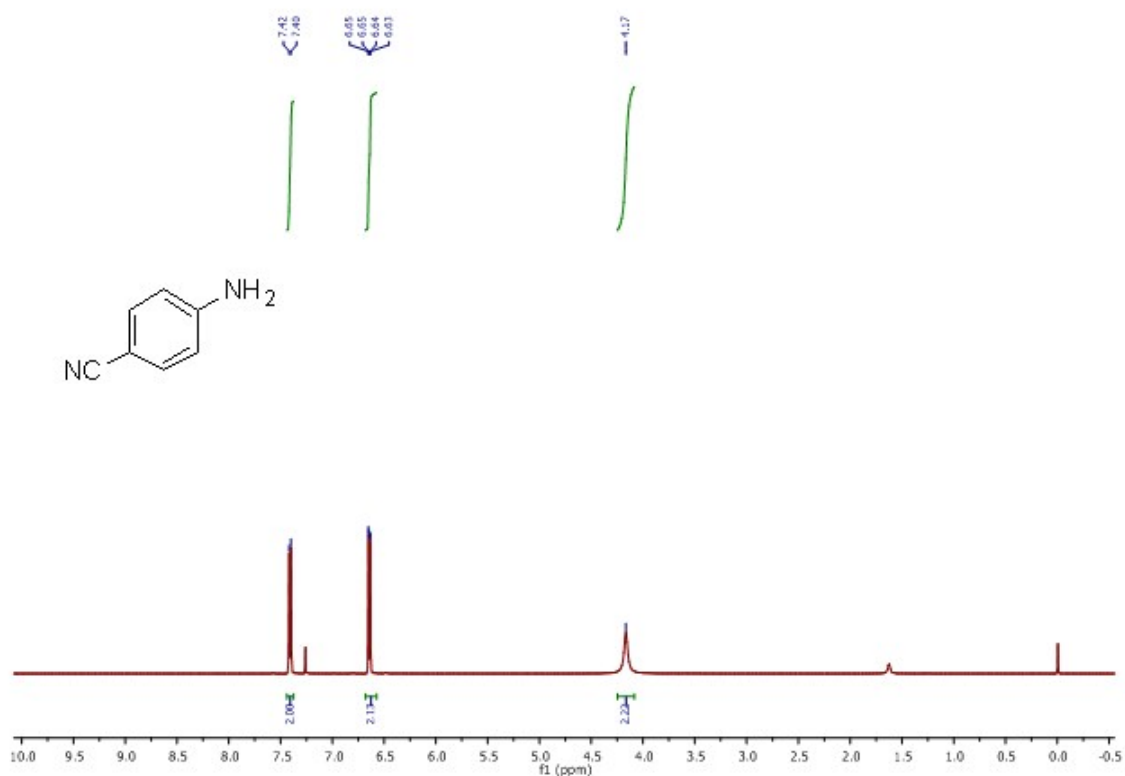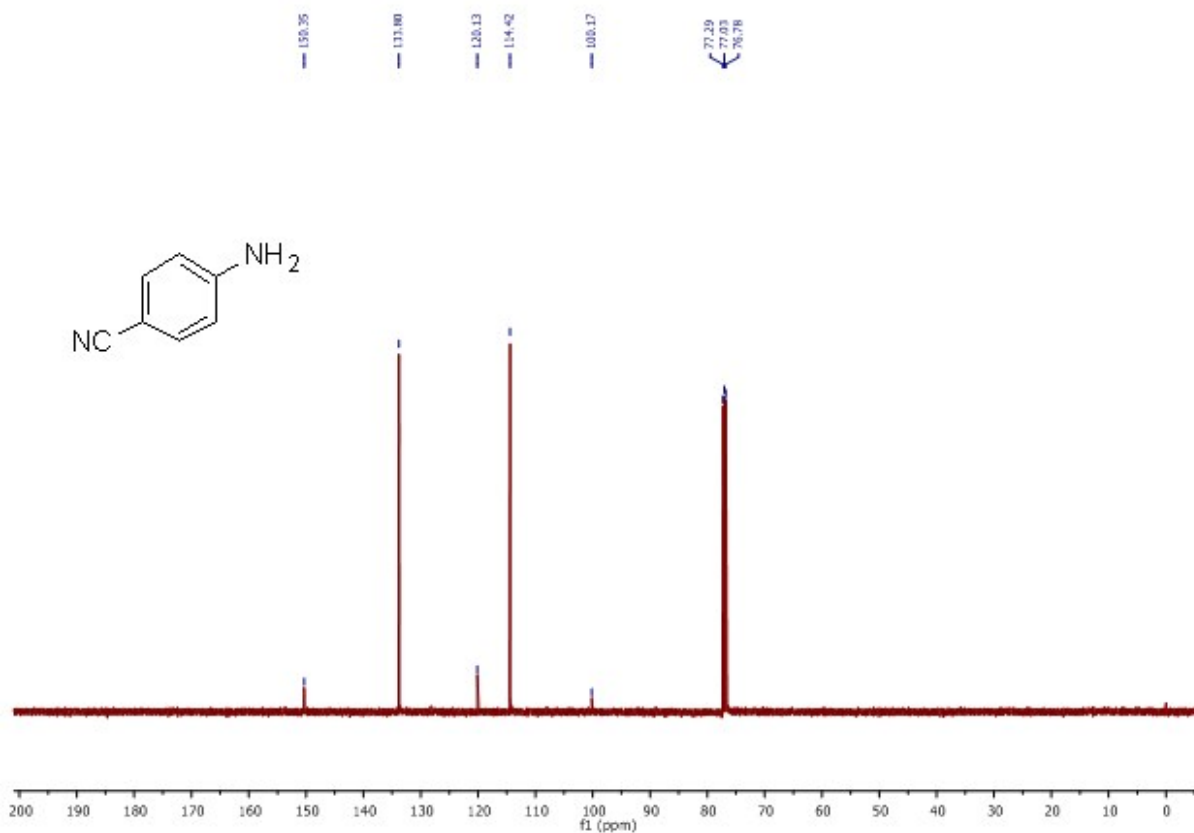

Supplement: c6ra09785e1.pdf [file c6ra09785e1.pdf]
